1  
2  
3  
4  
5  
6  
7  
8  
9  
10  
11  
12  
13  
14  
15  
16  
17  
18  
19  
20  
21  
22  
23

**Clearing the FoG: Antifungal tolerance is a subpopulation effect that is distinct from resistance and is associated with persistent candidemia**

Alexander Rosenberg<sup>1\*</sup>, Iuliana V. Ene<sup>2\*</sup>, Maayan Bibi<sup>1</sup>, Shiri Zakin<sup>1</sup>, Ella Shtifman Segal<sup>1</sup>, Naomi Ziv<sup>3</sup>, Alon M. Dahan<sup>1</sup>, Arnaldo L. Colombo<sup>4</sup>, Richard J. Bennett<sup>2</sup>, Judith Berman<sup>1\*\*</sup>

1. School of Molecular Cell Biology and Biotechnology, Tel Aviv University, Ramat Aviv Israel
2. Department of Molecular Microbiology and Immunology, Brown University, Providence, Rhode Island, USA
3. Department of Microbiology & Immunology, University of California, San Francisco, San Francisco, CA, USA
4. Department of Medicine, Federal University of São Paulo, São Paulo, Brazil

\*Equal contributions

\*\*Corresponding Author: [judithberman11@gmail.com](mailto:judithberman11@gmail.com), +972-52-584-2031

24 **Abstract**

25 Drug susceptibility, defined by the minimal inhibitory concentration (MIC), often does not  
26 predict whether fungal infections will respond to therapy in the clinic. Tolerance at supra-MIC  
27 antifungal drug concentrations is rarely quantified and current clinical recommendations suggest  
28 it be ignored. Here, we measured and characterized drug-response variables that could  
29 influence the outcomes of fungal infections and be generalizable across major clades of  
30 *Candida albicans*, one of the most frequently isolated human fungal pathogens. We quantified  
31 antifungal tolerance as the fraction of growth (FoG) above the MIC and found that it is clearly  
32 distinct from susceptibility/resistance measured as MIC. Instead, tolerance is due to the slow  
33 growth of subpopulations of cells that overcome drug stress more efficiently than the rest of the  
34 population, and correlates inversely with the accumulation of intracellular drug. Importantly,  
35 many adjuvant drugs used together with fluconazole, a fungistatic drug, reduce tolerance  
36 without affecting resistance. These include inhibitors of major stress response hubs such as  
37 Hsp90, calcineurin, PKC1 and TOR. Accordingly, in an invertebrate infection model, adjuvant  
38 combination therapy was significantly more effective than fluconazole alone in treating highly  
39 tolerant isolates and did not improve the treatment of isolates with low tolerance levels.  
40 Furthermore, isolates recovered from immunocompetent patients with persistent candidemia  
41 displayed significantly higher tolerance than isolates that were readily cleared by fluconazole.  
42 Thus, tolerance correlates with the response to fluconazole therapy in patients and may help  
43 predict whether infections will respond to fluconazole alone. Similarly, measuring tolerance may  
44 provide a useful clinical parameter for choosing appropriate therapeutic strategies to overcome  
45 persistent clinical candidemia.

46

47

48

49

## 50 Introduction

51 A goal of antimicrobial susceptibility testing is to predict the clinical success or failure of  
52 antibiotic therapy. Some infections are recalcitrant to drug treatment due to ‘resistance’, which  
53 refers to microbial growth in the presence of drug concentrations that inhibit susceptible  
54 isolates<sup>1,2</sup>. Susceptibility is commonly measured as the Minimal Inhibitory Concentration (MIC)  
55 after 24 h of growth in the presence of drug<sup>3,4</sup>. Fungal infections generally follow the “90/60” rule  
56 for predicting therapeutic outcomes based on *in vitro* susceptibility testing: ~90% of susceptible  
57 isolates and 60% of resistant isolates respond to therapy<sup>5-9</sup>. This implies that infection  
58 outcomes are influenced by host factors as well as features of the pathogen that are not  
59 reflected by the MIC<sup>10,11</sup>. In effect, organisms that cause persistent infections, defined as those  
60 that are not cleared by a course of antifungal treatment, have similar susceptibilities to  
61 organisms that are readily cleared by a course of antifungal treatment<sup>12</sup>. Accordingly, it is  
62 important to identify measurable parameters that can contribute to disease severity.

63 Only four classes of antifungals are currently in clinical use, and resistance to azoles,  
64 including fluconazole (FLC), the most commonly administered antifungal against *Candida*  
65 species, is an increasing problem. Altered drug uptake/drug efflux and changes in ergosterol  
66 biosynthesis (the target for azole drugs)<sup>13</sup> are the major known mechanisms of azole resistance.  
67 Stress responses have been proposed as a third mechanism of antifungal resistance<sup>14</sup>. A  
68 broad range of small molecules enhance antifungal activity *in vitro* and *in vivo*, with inhibitors of  
69 Hsp90, calcineurin and TOR the most prominent among them<sup>15-18</sup>. Combination therapy using  
70 antifungals together with such inhibitors has been proposed as a promising strategy to extend  
71 the efficacy of current drugs<sup>19-24,25,26,27</sup>. In addition, several psychotherapeutic agents such as  
72 fluoxetine, fluphenazine or sertraline can enhance FLC activity against fungal species<sup>21,28-30</sup>.  
73 Whether such adjuvants affect therapeutic outcomes remains to be addressed.

74 Persistent candidemia, defined as the failure to clear a bloodstream infection caused by  
75 a susceptible organism<sup>12,31,32</sup>, is associated with increased mortality. In one study, the mortality

76 rate was 54% among infections with persistent candidemia and only 3% among those with non-  
77 persistent candidemia<sup>33</sup>. Mechanisms underlying persistent candidemia may include variability  
78 in the pharmacology of the drug, suboptimal dosing, presence of fungal biofilms on indwelling  
79 catheters, and reduced immunity. We posit that some responses to the drug are not captured  
80 by measuring the MIC alone and that additional parameters could be used to predict the  
81 likelihood that a clinical isolate might respond poorly to antifungal drugs. Furthermore,  
82 understanding the mechanisms that underlie these parameters is critical for the development of  
83 new therapeutic approaches against persistent *Candida* infections.

84 MIC measurements have been optimized to minimize or ignore residual fungal  
85 growth<sup>9,34,35</sup>, termed ‘tolerance’ or ‘trailing growth’, which has been discussed in the literature for  
86 over 20 years<sup>36,37</sup> and is detected in 25-60% of clinical isolates<sup>4,10,19,38-44</sup>. This recommendation  
87 is based upon studies of acute infections using the mouse model of bloodstream candidiasis<sup>45-</sup>  
88 <sup>47</sup>, and the observation that isolates with high trailing growth in mucosal infections respond  
89 positively to short term antifungal treatment, despite later recurrence of infection<sup>48</sup>. Trailing  
90 growth is sensitive to environmental conditions, including pH, temperature and nutrients<sup>3,49,50</sup>  
91 and is usually detected in liquid cultures. Definitions of ‘tolerance’ vary and generally describe  
92 survival or growth above inhibitory concentrations<sup>2,10,28,38,51-56</sup>, detected as slow growth within  
93 the zone of inhibition using E-strips or disk diffusion assays<sup>57,58</sup>, or in broth microdilution  
94 assays<sup>38,39</sup>. Tolerance can be affected by several adjuvant drugs<sup>19-24</sup>, iron levels<sup>19,59</sup>, genes  
95 involved in vacuolar protein sorting<sup>38,47</sup>, as well as calcium flux<sup>28,55,59-61</sup>. However, the precise  
96 relationship between the outcome of fungal infections and tolerance or trailing growth has not  
97 been determined. Because tolerant cells continue to divide in the presence of antifungals, we  
98 postulated that they contribute to the persistence and/or recurrence of fungal infections.

99 Here, we measured susceptibility and tolerance in a broad range of clinical isolates  
100 spanning the major *C. albicans* clades<sup>62-64</sup> and asked how these parameters influence fungal  
101 infection outcomes. We analyzed disk diffusion assays using *diskImageR*, and quantified the

102 radius (RAD) of the zone of inhibition, a parameter that relates to the MIC<sup>65</sup>, and the fraction of  
103 growth (FoG) within the zone of inhibition, a parameter that measures tolerance<sup>19,38,50,66-68</sup>. We  
104 found that a range of adjuvant drugs, used in combination with FLC, increased drug cidalty by  
105 reducing FoG and not MIC and were effective both *in vitro* and *in vivo* at inhibiting strains with  
106 high (and not low) FoG levels. Finally, highly tolerant isolates were associated with persistent  
107 candidemia, suggesting that knowing the tolerance level of an infecting isolate may have  
108 important clinical implications and may inform treatment options.

109

## 110 **Results**

111 **Tolerance measured as FoG is distinct from drug resistance.** We quantified drug  
112 responses in *C. albicans* isolates from different genetic backgrounds and types of infections  
113 using *diskImageR*, a quantitative analysis tool that measures RAD, the radius of the zone of  
114 inhibition, an indicator of susceptibility that relates to MIC<sup>69,70</sup>, and FoG, the fraction of growth  
115 within the zone of inhibition, relative to the maximum possible growth<sup>65</sup> (Fig. 1a). A screen of  
116 219 clinical isolates (Supplementary Table 1) revealed that FoG levels ranged widely from 0.10  
117 to 0.85 and did not correlate with RAD levels (Fig. 1b,c), indicating that FoG and RAD measure  
118 independent drug responses. FoG was detected in response to other drugs including fungistatic  
119 antifungals (azoles, 5-fluorocytosine) and, to a lesser degree, to fungicidal agents  
120 (echinocandins, polyenes) (Supplementary Fig. 1a). Antifungal responses varied widely in  
121 different *Candida* species as well as in *S. cerevisiae* (Supplementary Fig. 1b). For example, *C.*  
122 *glabrata* exhibited the highest tolerance to azoles, followed by *C. tropicalis* and *C. krusei*, while  
123 *S. cerevisiae* had low tolerance to azoles and intermediate tolerance to echinocandins and  
124 polyenes.

125 Broth microdilution assays define the MIC<sub>50</sub> - the lowest drug concentration that inhibits  
126 50% of growth at 24 h (termed MIC throughout the manuscript). Most reports of 'trailing growth'  
127 or 'tolerance' monitor growth at 48 h<sup>48-50,71</sup>. We quantified supra-MIC growth (SMG) at 48 h

128 (average growth per well above the MIC<sub>50</sub>, normalized to growth without FLC; Fig. 1d). Most  
129 isolates exhibited some level of SMG at 48 h, while MIC levels remained unchanged between  
130 24 and 48 h (Fig. 1e-g). Thus, SMG provides a parameter that, like FoG, is distinct from MIC.

131 Importantly, cells exhibiting FoG in disk assays or SMG in broth assays, are not due to  
132 the emergence of drug resistance. Thus, for a given isolate, FoG and SMG levels were  
133 reproducible for cells taken from inside or outside the zone of inhibition, or for cells taken from  
134 wells above or below the MIC (Supplementary Fig. 2a, b). These cells yield progeny  
135 indistinguishable from other cells in the population, and thus are the result of phenotypic  
136 heterogeneity rather than genetic alteration. Consequently, tolerance is due to growth  
137 heterogeneity in the population and is stable for a given isolate.

138 While SMG and FoG correlated well with each other ( $R^2 = 0.82$ ,  $P < 0.01$ ), there was no  
139 relationship between FoG and RAD ( $R^2 < 0.01$ ), or SMG and MIC ( $R^2 = 0.25$ ,  $P < 0.01$ ,  
140 Supplementary Fig. 2c). FoG and SMG therefore reflect similar features of growth at supra-MIC  
141 concentrations that are distinct from drug susceptibility/resistance, as measured by RAD or MIC,  
142 which are concentration-dependent parameters. Accordingly, whereas RAD increased with  
143 increasing drug concentrations in the disk (Fig. 1h), FoG remained similar irrespective of drug  
144 concentration. Similarly, SMG levels remained constant across a broad range of supra-MIC  
145 concentrations (Fig. 1e). Thus, tolerance measured as FoG or SMG is not dependent upon  
146 drug concentration, highlighting the distinctive nature of tolerance relative to  
147 susceptibility/resistance.

148  
149 **Environmental modulation of drug responses.** FoG and SMG levels were reduced at pH 4.5  
150 relative to pH 7, while RAD/MIC levels remained relatively stable (Supplementary Fig. 3a,b).  
151 FoG/SMG values also decreased with higher temperatures (37-41°C) while RAD/MIC levels  
152 showed less variation with increasing temperature (Supplementary Fig. 3c,d). For some strains,  
153 including SC5314, RAD and/or FoG levels varied considerably depending on the growth media

154 (Supplementary Fig. 3e). A series of strains derived from SC5314 by passaging were  
155 particularly sensitive to media differences, with lower RAD and higher FoG levels on rich  
156 medium (YPD) than on casitone medium (Supplementary Fig. 3f), emphasizing that assays  
157 must be performed under consistent conditions to ensure reproducible results. Importantly,  
158 differences in genetic background can have a major effect on how *C. albicans* strains respond  
159 to environmental conditions.

160

161 **Subpopulation growth dynamics.** To ask if tolerance reflects the size of a dividing  
162 subpopulation at supra-MIC concentrations, we compared the number of cells that form colonies  
163 (CFUs) in the presence of supra-MIC FLC concentrations to total CFUs without drug. CFUs on  
164 drug ranged between 2% and 98% of the total population and correlated with FoG levels (Fig.  
165 2a,  $R^2 = 0.91$ ,  $P < 0.01$ ). The proportion of the subpopulation that grew at supra-MIC FLC in  
166 liquid cultures did not change with inoculum size (Supplementary Fig. 3g), indicating that  
167 FoG/SMG is independent of cell density. Importantly, these results establish that FoG levels  
168 represent the proportion of the population that can form colonies or grow above the MIC.

169 Growth dynamics were also monitored using microcolony assays, in which time-lapse  
170 microscopy follows colony area/size (Fig. 2b)<sup>72</sup>. As expected<sup>73</sup>, exponentially growing cells  
171 plated on 10  $\mu\text{g/ml}$  FLC did not stop growing immediately. Rather, most cells continued dividing  
172 for ~5 h, and then slowed or stopped dividing to different degrees (Fig. 2c,d and Supplementary  
173 videos 1-4). In high FoG isolates (e.g., SC5314), a large proportion of the cells yielded  
174 microcolonies, while in low FoG isolates (e.g., P87), more cells stopped dividing (black dots in  
175 Fig. 2b). Differences in growth rates became apparent after 10-15 h in FLC (Fig. 2d),  
176 supporting the idea that different subpopulations have different growth dynamics, and that high  
177 FoG strains produce a larger subpopulation of growing colonies than low FoG isolates.

178 The dynamics of colony growth on agar plates was also examined using *ScanLag*, a  
179 flatbed scanner/image analysis pipeline<sup>74</sup> that we adapted for use with *C. albicans*. Here, the

180 area occupied by light pixels and the change in this area over time are proxies for colony size  
181 and growth rate, respectively<sup>74</sup>. Different *C. albicans* isolates exhibited different initial time of  
182 colony appearance (ToA) on medium without drug (Supplementary Fig. 4). At 10 µg/ml FLC, the  
183 ToA was delayed relative to the drug-free condition (except for resistant strains such as T101,  
184 Fig. 2e,f). Notably, the  $\Delta$ ToA (ToA on FLC – ToA without FLC) of high FoG isolates was shorter  
185 than that of low FoG isolates (Fig. 2f), and correlated with overall FoG levels (Fig. 2g). This  
186 suggests that high FoG strains overcome the inhibitory pressures of the antifungal more  
187 efficiently than low FoG strains. Consistent with this, in liquid assays with drug, highly tolerant  
188 isolates also displayed shorter lag times than related isolates with low tolerance levels  
189 (Supplementary Fig. 5a).

190 A number of *C. albicans* growth parameters did not correlate with FoG levels. These  
191 included cell viability in the presence of drug (Fig. 2h), consistent with FLC being fungistatic  
192 rather than fungicidal. Unlike tolerant bacteria, which display reduced growth rates and longer  
193 colony appearance times<sup>2,75-77</sup>, antifungal tolerance did not correlate with slower growth in three  
194 sets of related *C. albicans* strains grown in liquid without drug, including: (1) passaged  
195 derivatives of SC5314 with altered FoG levels, (2) a slow-growing clinical isolate (P37005) and  
196 faster growing derivatives<sup>78</sup> and (3) a *clb4* mutant<sup>79</sup> with delayed cell cycle progression relative  
197 to control strains (Supplementary Fig. 5b). Furthermore, exponential and stationary phases  
198 yielded similar FoG levels (Supplementary Fig. 5c), unlike phenotypic drug resistance in  
199 bacteria<sup>80</sup>. Growth parameters (colony size and growth rate, liquid growth rate and lag phase  
200 duration) also failed to show any correlation with FoG levels (Supplementary Fig 5d,e). This  
201 implies that tolerance is not simply a reflection of faster growth in the presence or absence of  
202 drug. Rather, it reflects two aspects of *C. albicans* growth dynamics: a larger subpopulation able  
203 to form colonies at supra-MIC drug concentrations (Fig. 2a), and a faster relative recovery in  
204 response to fungistatic pressures.

205



206 **Decreased intracellular drug levels underlie increased tolerance.** A recently developed  
207 fluorescent azole probe, FLC-Cy5<sup>81</sup>, provides a powerful tool to monitor intracellular drug levels  
208 and uptake rates using flow cytometry (Fig. 3a). The initial rate of FLC-Cy5 uptake per cell  
209 varied between strains and showed a weak inverse correlation with FoG levels ( $R^2 = 0.64$ ,  $P =$   
210  $0.12$ , Fig. 3b). By contrast, steady state FLC-Cy5 levels at 24 h correlated inversely with FoG  
211 levels ( $R^2 = 0.8$ ,  $P < 0.01$ , Fig. 3c). Cells were categorized as having low, mid, and high levels of  
212 FLC-Cy5 (at 24 h). FoG levels inversely correlated with the proportion of cells that contained  
213 high FLC-Cy5 levels ( $R^2 = 0.82$ ,  $P = 0.04$ ) and positively correlated with the proportion of cells  
214 containing mid FLC-Cy5 levels ( $R^2=0.81$ ,  $P = 0.05$ , Fig. 3d,e).

215         Based on the assumption that the steady state drug levels are influenced by both drug  
216 efflux and uptake, we measured efflux of rhodamine-6-G (R6G), a dye removed primarily via the  
217 ABC class of transporters<sup>82</sup>. In general, the rate of R6G efflux was higher in the presence, than  
218 in the absence, of FLC, with SC5314 as the notable exception (Fig. 3f and Supplementary Fig.  
219 6a). Yet, efflux rates did not correlate with FoG under any of the conditions tested  
220 (Supplementary Fig. 6b,  $R^2 < 0.2$ ). Thus, the determinants of steady state intracellular FLC  
221 levels are complex, and include uptake and efflux rates as well as other factors (Fig. 3g).

222  
223 **Adjuvant drug combinations clear tolerance and do not alter resistance.** Combination  
224 therapies has the potential to extend the lifespan of the few available antifungal drug  
225 classes<sup>24,83-85</sup>. We tested a series of adjuvant drugs to determine their quantitative effect on  
226 fungal responses when used together with FLC. Most adjuvants significantly reduced FoG,  
227 including geldanamycin and radicicol, which inhibit Hsp90 activity<sup>15,27,61,86</sup>, cyclosporine A and  
228 FK506, which inhibit calcineurin<sup>87-89</sup> and staurosporine, which inhibits PKC1 activity<sup>90</sup>. In  
229 addition, other adjuvants not directly connected to Hsp90 function also reduced FoG, including  
230 aureobasidin A, which inhibits sphingolipid biosynthesis<sup>20</sup>; rapamycin, an inhibitor of the mTOR  
231 signaling pathway<sup>22,91</sup>; tunicamycin, an inducer of the unfolded protein response pathway<sup>92-94</sup>;

232 fluoxetine, a serotonin inhibitor<sup>21</sup>; and fluphenazine, an antipsychotic drug that stimulates ABC  
233 transporter expression and indirectly inhibits calcineurin via calmodulin<sup>23,28,95</sup>. FLC + adjuvant  
234 cleared tolerance for all 7 clinical isolates tested (Fig. 4a,b), as well as for a longitudinal series  
235 from a single HIV patient<sup>96,97</sup> that had acquired resistance over time, and for a set of persistent  
236 and non-persistent clinical isolates (Supplementary Fig. 7a-d). Importantly, most adjuvants had  
237 little or no effect on RAD/MIC levels (Fig. 4a,b and Supplementary Fig. 7a-d), and thus are not  
238 expected to affect resistance in standard susceptibility assays<sup>34,98</sup>.

239 Hsp90-dependent responses affected tolerance and not susceptibility/resistance  
240 measured as MIC (at 24 h). Consistent with this, the effects of temperature and Hsp90 inhibitors  
241 correlated well with FoG ( $R^2 = 0.93$ , Supplementary Fig. 7e) and only partially with RAD ( $R^2 = -$   
242  $0.61$ , Supplementary Fig. 7f). Thus, temperature inhibition of Hsp90 affects tolerance and not  
243 resistance *per se*. Furthermore, FoG levels were not affected by Hsp90 steady state protein  
244 levels, as the amount of Hsp90 did not correlate with FoG ( $R^2 = 0.07$ , Supplementary Fig. 7g).  
245 Because inhibitors of calcineurin and Hsp90 are known to affect FLC cidality<sup>15,24,27,61,67,88,99,100</sup>,  
246 we asked whether other adjuvant drugs have a similar effect. All tested combinations were cidal  
247 (Fig. 4c and Supplementary Fig. 7h), indicating they have a profound effect on cell viability at  
248 supra-MIC FLC concentrations and implying that stress pathways make essential contributions  
249 to tolerance.

250 Consistent with the adjuvant drug responses, genes involved in several pathways,  
251 including calcineurin-<sup>101</sup> and PKC signaling<sup>90</sup>, primarily affect FoG and not RAD (Fig. 4d,  
252 Supplementary Fig. 8, Supplementary Tables 3, 4, and Supplementary Text). In addition, *IRO1*,  
253 which is involved in iron homeostasis<sup>19</sup> and *VPS21*, which is involved in vacuolar trafficking<sup>38</sup>,  
254 affected FoG and not RAD. Thus, many genetic pathways affect the ability of subpopulations of  
255 cells to grow in the presence of supraMIC FLC concentrations, including Hsp90-dependent and  
256 -independent responses that are due to tolerance rather than resistance.

257

258 **Adjuvant drugs improve FLC efficacy against high FoG strains *in vivo*.** Given that the  
259 beneficial effects of adjuvant drugs are more evident on high FoG strains, we asked if adjuvant  
260 therapy would distinguish between levels of tolerance in an infection model. *Galleria mellonella*  
261 larvae were used to test potential *in vivo* differences between isolates with different tolerance  
262 levels, both with respect to their ability to cause disease, and with their ability to respond to  
263 therapy with FLC alone or FLC plus the adjuvant fluphenazine<sup>29,102</sup> (FNZ, Fig. 4a). A series of  
264 isolates was derived by passaging the SC5314 strain in the presence or absence of FLC. The  
265 resulting isolates had indistinguishable RAD but distinct FoG levels relative to the parental strain  
266 (Supplementary Fig. 9a and Supplementary Table 1).

267 *G. mellonella* larvae infected with fungal cells were treated with either PBS (control),  
268 FLC, or combination therapy (FLC and FNZ) (Fig. 5a). SC5314 and derived strains with similar  
269 FoG levels killed all larvae within 9-14 days. Importantly, these lower FoG isolates had similar  
270 responses to FLC and to the FLC+FNZ combination: they rescued up to 17% of the infected  
271 larvae (Fig. 5b,c and Supplementary Fig. 9b). By contrast, high FoG strains displayed delayed  
272 killing and decreased virulence in the larvae, and did not respond to FLC alone (Fig. 5d and  
273 Supplementary Fig. 9b). Notably, the FLC+FNZ combination significantly improved the  
274 outcomes for high FoG strains relative to FLC alone and PBS-control groups: larval death was  
275 delayed and up to 50% of larvae infected with high FoG strains survived the experiment (Fig. 5d  
276 and Supplementary Fig. 9b). Similar results were obtained with a low FoG clinical isolate  
277 (readily cleared by FLC therapy) when compared with a high FoG isolate (that persisted in the  
278 bloodstream during multiple rounds of FLC therapy) (Supplementary Fig. 9c). Presumably,  
279 FLC+FNZ significantly decreased larval killing by rendering FLC cidal for those cells growing at  
280 supra-MIC concentrations. Thus, *in vivo* responses to azoles and to combination therapies  
281 differed for different isolates according to their tolerance levels.

282

283 **Persistent candidemia is associated with highly tolerant isolates.** Echinocandins are  
284 considered the optimal line of therapy for patients with candidemia, yet FLC remains a frontline  
285 drug for systemic *C. albicans* infections<sup>103</sup>, especially in low income countries<sup>104</sup>. Treatment with  
286 FLC often fails despite isolates being drug-susceptible when tested *in vitro*, and rates of  
287 persistent candidemia are often higher in patients treated with FLC rather than with  
288 echinocandins<sup>105,106</sup>. To examine possible connections between susceptibility and tolerance  
289 levels, we collected sets of clinical isolates from patients with candidemia that were either  
290 efficiently cleared by a single course of FLC treatment (non-persistent) or that persisted in the  
291 host despite extended FLC therapy (Fig. 6a, Supplementary Fig. 10a, see detailed isolate  
292 description in Methods).

293 The drug responses of persistent and non-persistent isolates and several control strains  
294 displayed similar RAD and MIC levels (0.25-1 µg/ml), well below those of resistant strains  
295 (clinical MIC breakpoint = 4 µg/ml), when assayed at both 24 and 48 h (Fig. 6b and  
296 Supplementary Fig. 10b,c). Strikingly, FoG/SMG levels differed significantly between the two  
297 groups of clinical isolates, especially when compared at 48 h (Fig. 6b,c) and, as expected,  
298 correlated well with one another (Supplementary Fig. 10d,  $R^2 = 0.62$ ). Importantly, persistent  
299 candidemia isolates displayed higher FoG/SMG levels than those readily cleared upon FLC  
300 treatment. In fact, many persistent isolates had FoG levels higher than 0.5, indicating that over  
301 half of the cells in the population could grow, albeit slowly, in the presence of FLC (Fig. 6b).  
302 Taken together, these experiments demonstrate that tolerance is an intrinsic property distinct  
303 from drug susceptibility, and that tolerance levels correlate with infections that resist azole  
304 treatment in the clinic.

305

## 306 **Discussion**

307 Currently, decisions about therapeutic strategies to treat *Candida* infections are based  
308 upon patient status, infecting species and antifungal susceptibility, with clinical MIC assays

309 designed to avoid the detection of tolerance<sup>3,34</sup>. Here, quantification and characterization of  
310 tolerance across *C. albicans* isolates found that many of them exhibit tolerance, defined as the  
311 ability of a subpopulation of cells to grow slowly at supra-MIC concentrations. Tolerance is  
312 related to phenomena previously described as ‘trailing growth’<sup>3,38,39,49,50,67,71,107</sup>,  
313 ‘tolerance’<sup>10,19,40-42</sup> or Hsp90-dependent ‘resistance’<sup>15,51,61,90,108</sup>. Studying growth dynamics and  
314 quantifying tolerance revealed that it is: 1) a subpopulation effect and the size of the  
315 subpopulation is stable; 2) due to slow growth in drug stress; 3) correlates with intracellular drug  
316 levels; 4) dependent upon stress response pathways, and 5) mechanistically distinct from  
317 resistance. Several adjuvants completely cleared FoG without altering susceptibility (MIC) and,  
318 when combined with the fungistatic drug FLC, yielded a fungicidal cocktail. Consistent with this,  
319 combination therapy was most effective *in vivo* at treating infections by high tolerance strains,  
320 whereas the adjuvant did not improve FLC efficacy against low FoG isolates. Furthermore, *C.*  
321 *albicans* isolates that cause persistent candidemia exhibited significantly higher tolerance than  
322 isolates readily cleared by FLC. Thus, quantitatively measuring tolerance levels of infecting  
323 isolates may provide important prognostic insights concerning both the success of FLC therapy  
324 as well as the potential efficacy of combination therapies.

325         The subpopulation effect of tolerance is readily detected on agar plate assays, where  
326 individual cells and their clonal progeny are evident; in liquid assays, cells become mixed and  
327 subpopulation effects are more difficult to distinguish. Growth dynamics in colonies<sup>74</sup>,  
328 microcolony formation<sup>73</sup> and liquid growth assays all suggest tolerance correlates with the  
329 degree of growth after drug exposure. This implies that a subpopulation of cells is inherently  
330 more able to adapt to drug than the rest of the population. Since the size of such subpopulations  
331 appears stable, we suggest that tolerance is a function of cell physiology and environmental  
332 responsiveness that differs between genetic backgrounds and growth conditions.

333         We discovered that isolates with higher tolerance levels have more cells with lower  
334 intracellular drug levels, but tolerance is not a function of either uptake or efflux rates, despite

335 the well-known role of efflux in drug resistance<sup>109-118</sup>. The factors other than uptake and efflux  
336 that impact intracellular FLC levels remain to be determined.

337

338 **Adjuvant drugs increase FLC cidality and efficacy via tolerance, not resistance.** A novel  
339 insight from this work is that inhibitors of cellular stress improve fluconazole efficacy, primarily  
340 via their effect on tolerance and not resistance. This has two important implications. First, the  
341 subpopulation nature of tolerance suggests that these stress pathways must exhibit cell-to-cell  
342 variation. Second, the contributions of stress response pathways differ considerably between  
343 isolates, albeit in a manner that maintains population heterogeneity (and the size of the tolerant  
344 subpopulation) as a heritable feature of the given strain.

345 Tolerance is clearly related to the Hsp90-dependent response and distinct from *bona*  
346 *fide* resistance. Hsp90 and calcineurin are well known to affect fungal drug responses,  
347 including the cidality of azoles<sup>19,67,87,89,119-122</sup>. How the TOR pathway, the unfolded protein  
348 response, PKC signaling, sphingolipid synthesis, iron homeostasis, as well as fluoxetine and  
349 fluphenazine affect drug responses and increase FLC cidality remains to be determined.

350 The distinction between resistance and tolerance is consistent with the mechanisms that  
351 impact them: resistance mechanisms directly affect the drug target or its concentration in the  
352 cell, thereby enabling efficient growth in the presence of the drug<sup>14,111</sup>. By contrast, tolerance  
353 reflects stress response strategies that are indirect and may enable survival despite the  
354 continued ability of the drug to interact with its target, to remain in the cell and to affect cell  
355 growth. Stress responses can modulate physiology, for example membrane<sup>59,123,124</sup> or cell wall  
356 integrity<sup>125</sup> and the aggregation of proteins into stress granules or other physiological  
357 switches<sup>126</sup>, thereby minimizing deleterious cellular responses to the drug.

358

359 **Differences between antifungal and antibacterial tolerance.** The growth properties of cells  
360 at supra-MIC concentrations measured here with FLC, a fungistatic drug, contrast with those

361 measured for antibacterial tolerance in bactericidal drugs. This likely reflects distinct modes of  
362 action between static and cidal drugs as well as different molecular mechanisms of stress  
363 responses in eukaryotes and bacteria. Antibacterial tolerance generally involves a longer lag  
364 phase for the majority of the population<sup>75-77</sup>. By contrast, antifungal tolerance involves the earlier  
365 appearance of a subpopulation of cells that continue to grow in the presence of drug and, unlike  
366 'phenotypic resistance' described for bacteria<sup>127</sup>, is not dependent upon growth phase or cell  
367 density.

368

369 **Clinical implications.** This study revisited the question of whether supra-MIC growth is  
370 clinically relevant and, by inference, whether the stress pathways that mediate it represent  
371 important drug targets. Previous work suggested that trailing growth was not important for  
372 virulence in either mouse models<sup>45,46</sup> or infection outcomes in the human host<sup>48</sup>. However, these  
373 studies analyzed short-term responses, rather than persistence or recurrence of *Candida*  
374 infection over longer time frames. Here, both *in vivo* and clinical studies provide a proof of  
375 principle suggesting that retrospective and prospective clinical studies that measure tolerance  
376 are warranted. We posit that monitoring FoG/SMG in standard clinical assays may have  
377 prognostic value for the likelihood of a persistent infection, for the responsiveness of a given  
378 isolate to FLC, as well as for the synergism of an adjuvant drug with FLC. Furthermore, in  
379 developing countries where azoles remain the major antifungals in use, measuring tolerance  
380 may be especially relevant and the addition of low cost adjuvant drugs could significantly impact  
381 treatment outcomes (e.g.,<sup>128</sup>). Understanding the contribution of tolerance to the progression of  
382 fungal infections not only can provide fundamental insights into the biology of fungal  
383 subpopulation behaviors, but also has the potential to inform clinical practices.

384

385 **Methods**

386 ***C. albicans* isolates.** All strains (Supplementary Table 1) were streaked onto rich media (YPD)  
387 plates and grown for 24 h at 30°C. A single colony from each strain was arbitrarily selected and  
388 frozen in 15% glycerol and stored at -80°C for all assays. For each mutant tested, we used  
389 genetically matched parental control strains and, where appropriate, nutrient supplements were  
390 used to compensate for auxotrophies (Supplementary Table 4).

391 Isogenic SC5314 low and high FoG isolates were obtained by sequentially passaging  
392 SC5314 every 24 h in YPD (1/100 dilutions, ~84 generations) either with or without 1 µg/ml  
393 FLC. Persistent and non-persistent clinical isolates were obtained from patients with  
394 candidemia that were investigated by Dr Colombo during several candidemia surveys<sup>129</sup>.  
395 Fungal isolates were obtained from two groups of patients: patients with a single episode of  
396 candidemia, for which infection was resolved after the first course of antifungal therapy, and  
397 patients with persistent candidemia. Persistent candidemia was defined here as two or more  
398 blood cultures positive for *C. albicans*, on one or more days apart, despite at least 3 days of  
399 antifungal therapy with FLC. Non-persistent isolates (NP1-7) were cleared from the  
400 bloodstream soon after FLC treatment was initiated and treatment was continued for an average  
401 of 16 days. In contrast, persistent infections in 12 patients yielded serial isolates both prior to  
402 and throughout the course of treatment, with 3 to 9 isolates per patient treated for an average of  
403 20 days (P, S01-S12, Supplementary Fig. 10a). Persistent candidemia in these patients  
404 occurred despite clinical MIC assays having established that all isolates were FLC susceptible,  
405 with MIC levels < 1 µg/ml. While each patient had distinct clinical backgrounds and trajectories,  
406 the two groups were matched in terms of age, underlying conditions, time of central venous  
407 catheter removal, and first line of antifungal therapy. Patients received intravenous FLC as first  
408 line of therapy and the initial time of therapy did not differ between persistent and non-persistent  
409 infections. In some cases of persistent candidemia, antifungal therapy was continued with either  
410 caspofungin or amphotericin B (Supplementary Fig. 10a). Of the 19 patients, 7 patients died  
411 during the 30 day follow up, 6 of which were unable to clear the fungal infection, although



412 causality between infection and death could not be determined. Isolates from patients with  
413 cancer, neutropenia, endocarditis, deep-seated *Candida* infections, corticosteroid or other  
414 immunosuppressive drug exposure were excluded from the study. All ethical regulations were  
415 observed and the study was approved by the Ethical Committee of the Federal University of  
416 São Paulo (January, 2016, NO 9348151215).

417

418 **Strain construction.** To disrupt the two alleles of the *RCN2* gene, we amplified (using primers  
419 BP1440 and BP1441, Supplementary Table 5) the flanking sequence of ORF C7\_01700W  
420 using BJB-T 2 (*HIS1*) and BJB-T 61 (*ARG4*) plasmids as a template (Supplementary Table 5).  
421 Strain YJB-T65 was transformed with this PCR product to generate heterozygote mutant YJB-T  
422 2214 (*rcn2::HIS1*) and subsequently homozygote mutant YJB-T2227 (*rcn2::HIS1/rcn2::ARG4*).  
423 The disruptions were verified using primers BP1444 and BP1445.

424

425 **Broth micro dilution assays.** Minimal inhibitory concentration (MIC) for each strain was  
426 measured using CLSI M27-A2 guidelines<sup>98</sup> with minor modifications as follows. Strains were  
427 streaked from glycerol stock onto YPD agar and grown for 24 h at 30°C. Colonies were  
428 suspended in 1 ml PBS and diluted to 10<sup>3</sup> cells/ml in a 96-well plate with casitone containing a  
429 gradient of two-fold dilutions per step of FLC, with the first well contain no drug. For persistent  
430 and non-persistent clinical isolates, cells were grown overnight in YPD at 30°C and diluted to  
431 10<sup>4</sup> cells/ml in YPD containing a gradient of two-fold dilutions per step of FLC. MIC<sub>50</sub> levels  
432 were determined after 24 h or 48 h by taking an optical density reading (OD<sub>600</sub>) by a Tecan  
433 plate reader (Infinite F200 PRO, Tecan, Switzerland). MIC<sub>50</sub> levels (shown as yellow lines on  
434 broth microdilution assays heatmaps) were determined as the point at which the OD<sub>600</sub> had  
435 been reduced by ≥50% compared to the no-drug wells.

436

437 **Disk diffusion assays.** The CLSI M44-A2 guidelines for antifungal disk diffusion susceptibility  
438 testing<sup>130</sup> were followed with slight modifications. In brief, strains were streaked from glycerol  
439 stocks onto YPD agar and incubated for 24 h at 30°C. Colonies were suspended in 1 ml PBS  
440 and diluted to  $1 \times 10^6$  cells/ml.  $2 \times 10^5$  cells were spread onto 15 ml casitone plates (9 g/l Bacto  
441 casitone, 5 g/l yeast extract, 15 g/l Bacto agar, 11.5 g/l sodium citrate dehydrate and 2%  
442 glucose, 0.04 g/l Adenine, 0.08 g/l Uridine). For persistent and non-persistent clinical isolates,  
443 cells were grown overnight in YPD and  $10^5$  cells were spread onto 15 ml YPD plates. To  
444 facilitate comparisons between casitone and YPD disk diffusion assays, a subset of control  
445 strains with different FoG levels were included in both types of assays (SC5314, GC75, P87).  
446 The fraction of growth and radius of inhibition levels, referred to as FoG and RAD throughout  
447 the manuscript, represent parameters measured at 20% drug inhibition (FoG<sub>20</sub> and RAD<sub>20</sub>,  
448 respectively). For disk diffusion assays performed with auxotrophic strains, supplementary  
449 amino acids were added to the media (0.04 g/l Histidine and 0.04 g/l Arginine). For disk assays  
450 with drug adjuvants, the following concentrations of drugs were used: 0.5 µg/ml geldanamycin,  
451 0.5 µg/ml radicicol, 0.5 µg/ml FK506, 0.4 µg/ml cyclosporine A, 20 µg/ml fluoxetine, 5 ng/ml  
452 aureobasidin A, 0.5 ng/ml rapamycin, 10 µg/ml fluphenazine, 50 µg/ml doxycycline, 12.5 ng/ml  
453 staurosporine and 0.25 µg/ml Tunicamycin. A single 25 µg FLC disk (6 mm, Oxoid, UK or  
454 Liofilchem, Italy) was placed in the center of each plate, plates were then incubated at 30°C for  
455 48 h, and each plate was photographed individually. Analysis of the disk diffusion assay was  
456 done using the *diskImageR* pipeline<sup>65</sup> and the R script is available at  
457 <https://github.com/acgerstein/diskImageR/blob/master/inst/walkthrough.R> . Several controls  
458 indicated that drug in the disk is stable: incubation of the disk on the plate for 24 h prior to  
459 plating cells did not change FoG levels. In addition, incubation of the disk on the plate for 24 h  
460 prior to plating cells did not affect FoG levels, neither did addition of a fresh disk to the plate  
461 after 24 h.

462

463 **ScanLag assay.** The ScanLag assay was adapted from<sup>74</sup> with minor modifications. Strains  
464 were streaked from glycerol stocks onto YPD agar and incubated for 24 h at 30°C. Colonies  
465 were suspended in 1 ml PBS, diluted to 10<sup>4</sup> cell/ml and ~ 500 were spread onto casitone plates  
466 with or without 10 µg/ml FLC (Sigma-Aldrich, St. Louis, MO). Plates were placed on the  
467 scanners at 30°C and scanned every 30 min for 96 h. Image analysis was done in MATLAB  
468 using the "ScanLag" script<sup>74</sup> that was adapted for yeast cells by changing the identification of  
469 the size of the colony to a minimum of 20 pixels.

470

471 **Viability assays.** Replica plating was performed from disk diffusion plates that were incubated  
472 at 30°C for 48 h. Master plates were inverted and pressed firmly on a sterile cotton velveteen  
473 stamp and then transferred to new casitone plates containing no drug. Replica plates were  
474 incubated at 30°C for 48 h, and then each plate was photographed individually.

475

476 **Enzyme-linked immunosorbent assay (ELISA).** The ELISA protocol was modified from<sup>131</sup>.  
477 Briefly, *C. albicans* cells were grown for 6 h at 30°C with shaking (220 RPM) in YPD with or  
478 without 10 µg/ml FLC (Sigma-Aldrich, St. Louis, MO) and harvested at exponential phase  
479 (OD<sub>600</sub> 0.6–0.8). Cells were centrifuged for 10 min (3000 rpm, 4°C), and washed once with ice-  
480 cold PBS. Pellets were resuspended in 200 µl lysis buffer (50 mM Hepes pH 7.5, 150 mM  
481 NaCl, 5 mM EDTA, 1% Triton X100, protease inhibitor cocktail (Roche Diagnostics)) together  
482 with acid-washed glass beads. Cells were then mechanically disrupted by vortexing for 30 min  
483 at 4°C. Cell lysates were diluted 1:10 in PBS and subjected to BCA analysis (Pierce  
484 Biotechnology, Rockford, IL) to determine protein concentrations. Cell lysates at 10 µg/ml  
485 concentration were incubated in 96-well ELISA plates for 18 h at 4°C. Wells were washed with  
486 PBST (PBS +0.05% Tween-20), blocked with 1% skim milk in PBST for 2 h at 37°C and  
487 washed. Rabbit polyclonal anti Hsp90 antibody (Dundee Cell Products, Scotland) was diluted

488 1:1000 in blocking buffer applied overnight at 4°C. Horseradish peroxidase-coupled donkey  
489 anti-rabbit IgG (1:1000 dilution, Jackson ImmunoResearch Laboratories, West Grove, PA) was  
490 incubated for 1 h at 37°C followed by washing. Detection was done with TMB (3,3',5,5'-  
491 tetramethybenzidine). The reaction was terminated with 0.16 M sulfuric acid and absorbance  
492 was measured at 450 nm in an ELISA plate reader.

493  
494 **FLC-Cy5 uptake measured by flow cytometry.** *C. albicans* cells were grown overnight in  
495 YPD media at 30°C. Cultures were diluted 1:100 in 3 ml casitone medium and incubated for 3  
496 h at 30°. Drugs were added to a final concentration of 10 µg/ml for FLC, and 1 µg/ml for FLC-  
497 Cy5<sup>81</sup>. Cells were harvested every 30 min and diluted 1:4 in 50% TE (50 mM Tris pH 8:50 mM  
498 EDTA). Data was collected from 25,000-35,000 cells per time point using 561 nM EX and  
499 661/20 nM EM in a MACSQuant flow cytometer and gated to by SSC<10<sup>3</sup> A.U and FSC>10<sup>4</sup> A.U  
500 in (SSC vs FSC) to eliminate small debris particles. Analysis was done using FlowJo 8.7  
501 software.

502  
503 **Efflux of Rhodamine 6G (R6G) as measurement of drug efflux capacity.** The assay was  
504 adapted from<sup>132</sup> with minor modifications. In brief, strains were stre  
505 aaked from glycerol stock onto YPD plates and incubated for 24 h at 30°C. Colonies were  
506 resuspended in 3 ml casitone medium and grown overnight in 30°C. Cultures were diluted  
507 1:100 in 5 ml casitone medium and incubated for 3 h at 30°. Cells were centrifuged, washed in  
508 5 ml PBS (pH 7), and resuspended in 2 ml PBS with or without 10 µg/ml FLC. Cells  
509 suspensions were incubated for 1 h at 30°C and R6G (Sigma-Aldrich, St. Louis, MO USA) was  
510 added at 10 µg/ml to allow R6G accumulation (1 h). Next, cells were washed twice with PBS at  
511 4°C, and resuspended in a final volume of 300 µl PBS. 50 µl of individual suspensions were  
512 diluted in 150 µl PBS and aliquoted into a 96-well microtiter plate. Baseline emission of

513 fluorescence (excitation 344 nm, emission 555 nm) was recorded for 5 min in a Tecan plate  
514 reader at 30°C (Infinite F200 PRO, Tecan, Switzerland), in relative fluorescence units (RFU),  
515 and 1% D-glucose was next added to each strain to initiate R6G efflux. Negative controls  
516 contained no glucose and data points were recorded for 90 min in triplicates at 1 min intervals.  
517

518 ***G. mellonella* virulence assays.** *G. mellonella* larvae were obtained from Vanderhorst  
519 Wholesale (Saint Marys, OH) and the infection protocol was adapted from Li *et al*<sup>133</sup>. Larvae  
520 were kept at 15°C and used within 1 week of delivery. Larvae were randomly selected for each  
521 experiment in groups of 12 and those showing signs of melanization were excluded.  
522 *C. albicans* inoculums were prepared from cultures grown overnight at 30°C in YPD and  
523 washed twice with sterile PBS. Cells were counted using a hemocytometer and adjusted to 3 x  
524 10<sup>7</sup> cells/ml in sterile PBS. Each larva was initially injected with 3 x 10<sup>5</sup> cells via the last left pro-  
525 leg using a 10 µl glass syringe and a 26S gauge needle (Hamilton, 80300). A second injection  
526 with either FLC (1 mg/kg), FLC + fluphenazine (FNZ, 10 mg/kg), or sterile PBS was done via the  
527 last right pro-leg 1.5-2 h post infection. The inoculum size was confirmed by plating of fungal  
528 cells on YPD. Infected larvae and PBS injected controls were maintained at 37°C for 14 days  
529 and checked daily. Larvae were recorded as dead if no movement was observed upon contact.  
530 Virulence assays were performed with strain SC5314, with SC5314-derived isolates passaged  
531 for 12 days in either YPD alone (2 'low' FoG isolates) or YPD plus 1 µg/ml FLC (4 'high' FoG  
532 isolates), and with isolates NP03 and S12-01 from a clinical isolate set (see Supplementary  
533 Table 1). Experiments were performed in duplicate (n = 24 larvae) and statistical differences  
534 between larval groups were tested using the Mantel-Cox test. Negative controls included PBS,  
535 FLC alone or FLC + FNZ for groups of 24 larvae. No significant killing of larvae was observed  
536 in either of these conditions.

537

538 **Growth assays.** To determine growth parameters (doubling time and lag phase duration), *C.*  
539 *albicans* cells were seeded at a concentration of  $2 \times 10^5$  cells/ml into 96-well plates containing  
540 YPD media. Plates were incubated for 48 h at 30°C with continuous shaking in a Tecan plate  
541 reader (BioTek) and the optical density reading ( $OD_{600}$ ) was recorded every 15 min.  
542 Measurements of doubling time and lag phase duration were determined using BioTek Gen5  
543 software and from 3 biological replicates, each performed in duplicate.

544

545 **Microcolony assays.** Microcolony assays were adapted from<sup>72</sup> with minor modifications.  
546 Colonies were resuspended in 3 ml casitone medium and grown overnight in 30°C. Cultures  
547 were diluted 1:30 in casitone medium and incubated at 30°C until cultures reached logarithmic  
548 phase (~3-4 h) and diluted to  $10^4$  cells/ml in casitone medium. For microscopy, glass-bottomed  
549 24-well plates (De-GROOT, Israel) were coated with 1 ml of a 200 µg/ml Concanvalin A solution  
550 (Type VI, Sigma-Aldrich, St. Louis, MO USA) for 3-4 h. Wells were washed twice with 1 ml  
551 ddH<sub>2</sub>O and  $10^4$  cells/ml in a 2 ml volume were added to wells with or without 10 µg/ml FLC.  
552 Plates were sealed with an optically clear film (Axygen, Corning, Israel) and spun at  
553 1200 rpm for 1 min. Images were captured in 100 fields per well for 48 h in 1 h intervals using  
554 a Nikon Ti Eclipse microscope equipped with a full-stage environmental chamber (set to 30°C)  
555 with a Nikon Plan Apo 10x (0.45 numerical aperture) objective using Nikon Elements AR  
556 software. The focusing routine utilized manual assignment for each well based on a single  
557 field<sup>134</sup>. Custom software for conducting microcolony experiments, including computing and  
558 tracking microcolony areas over time was adapted from<sup>72</sup>. Specific growth rates were calculated  
559 for 1500-5000 colonies per strain<sup>72</sup> by regressing the natural log of microcolony area over time.  
560 Growth rates were calculated separately for two time intervals (0-5 h and 10-15 h) and required  
561 to have an  $R^2 > 0.9$ . Replicate wells (3 per condition) were consistent and growth rate  
562 distributions were pooled.

563

564 **Statistical analyses.** All experiments represent the average of two or more biological  
565 replicates, with two technical replicates of each. Error bars represent the standard deviation.  
566 Statistical analyses were performed using two-tailed Student's *t* tests, one way ANOVAs and  
567 Tukey's multiple comparison tests using Microsoft Excel 2016 (Microsoft) and Prism 6  
568 (GraphPad);  $R^2$  tests were used for linear regressions. Significance was assigned for *P* values  
569 smaller than 0.05, asterisks denote *P* values as follows: \*\*\*,  $P < 0.001$ ; \*\*,  $P < 0.01$ ; \*,  $P < 0.05$ .

570

571 **Data availability.** The authors declare that all data supporting the findings of the study are  
572 available in this article and its Supplementary Information files, or from the corresponding author  
573 upon request.

574

575 **Acknowledgements.** We thank members of the Berman and Bennett labs for stimulating  
576 discussions throughout the work. We are grateful to G. Palmer, M. Lohse, O. Homann, A.  
577 Johnson, R. Ben-Ami, T. White, D. Soll, D. McCallum, F. Odds, D. Sanglard, L. Cowen, P.T.  
578 Magee, B. Cormack, P. Magwene, M. Kupiec, W. Fonzi, S. Noble, B.M. Vincent, S. Lindquist,  
579 and A. Colombo for providing strains and P. Lipke, M. Fridman, R. BenAmi, N. Dror, A.  
580 Selmecki, A.C. Gerstein and A. Forche for helpful comments on the manuscript. This work was  
581 funded by European Research Council Advanced Award 340087 (RAPLODAPT) to JB, by  
582 Fundação de Amparo a Pesquisa do Estado de São Paulo (FAPESP, Grant 2017/02203-7),  
583 Brazil to ALC, by National Institutes of Health grant AI081704 to RJB and by a Brazil Initiative  
584 Collaborative Grant from the Watson Institute to RJB and IVE.

585

#### 586 **Author contributions**

587 IVE, RJB and JB designed the study; AR, IVE and AD collected the data; AR and IVE analyzed  
588 the data, MB produced and analyzed data in Fig. 3a,d, SZ performed the experiment in  
589 Supplementary Fig. 7g, ESS constructed mutant strains, NZ implemented and helped analyze

590 data in Fig. 2b, ALC provided clinical isolates and clinical input to the paper; AR, IVE, RJB and  
591 JB wrote the manuscript.

592

### 593 **Figure legends**

594 **Figure 1.** Measuring drug responses of *C. albicans* clinical isolates in disk diffusion assays  
595 (DDAs) and in liquid broth microdilution assays (BMDAs). (a) *diskImageR* analysis measures  
596 pixel intensity corresponding to cell density, along 72 radii every 5°. The average radius (RAD)  
597 represents the distance in mm corresponding to the point where 20%, 50% or 80% growth  
598 reduction occurs (light, medium, dark blue dots). The fraction of growth inside the zone of  
599 inhibition (FoG) is the area under the curve (red) at the RAD threshold, divided by the maximum  
600 area. (b) Range of FoG levels in 219 *C. albicans* clinical isolates. Red, blue and green lines  
601 estimate high, medium and low FoG levels, respectively. Unless otherwise specified, disk  
602 diffusion assays were performed using a single 25 µg FLC disk and analyzed after 48 h at 30°C.  
603 (c) Comparison of FoG<sub>20</sub> and RAD<sub>20</sub> for the 219 isolates. (d) Illustration of MIC and supra-MIC  
604 growth (SMG) calculations. MIC<sub>50</sub> was calculated at 24 h as the FLC concentration at which  
605 50% of the growth was inhibited, relative to growth in the absence of drug. SMG was  
606 calculated as the average growth per well above the MIC divided by the level of growth without  
607 drug. FLC was used in two-fold dilutions (0, 0.125 to 128 µg/ml). (e) Heatmaps illustrating  
608 OD<sub>600</sub> levels for concentrations below the MIC (yellow bar) in cyan and above the MIC in yellow  
609 for the seven *C. albicans* isolates from Fig. 1c. Maps show OD<sub>600</sub> values at 24 and 48 h. (f-g)  
610 Effect of incubation time on RAD/MIC and FoG/SMG values. *diskImageR* analysis (f) and  
611 corresponding MIC and SMG levels (g) measured at 24 and 48 h for strains as in (d). Of note,  
612 truly drug-resistant strains such as T101 (MIC = 64, Fig. 1e), the small zone of inhibition makes  
613 FoG measurements less accurate than SMG levels. (h) RAD is concentration-dependent and  
614 FoG is concentration-independent as measured with disks containing increasing concentrations



615 of FLC (25, 50 and 300  $\mu\text{g}$ ) for strain SC5314 shown for illustration (left); RAD (middle) and FoG  
616 (right) levels for strains as listed.

617

618 **Figure 2.** Analysis of cells growing at supra-MIC concentrations. All tested strains, except for  
619 T101 (MIC = 64  $\mu\text{g}/\text{ml}$ ), had FLC MIC values below 10  $\mu\text{g}/\text{ml}$ . (a) FoG correlates with the  
620 proportion of colonies that grow on 10  $\mu\text{g}/\text{ml}$  FLC relative to growth on plates without drug. (b)  
621 Microcolony analysis at supra-MIC concentrations of FLC (10  $\mu\text{g}/\text{ml}$ ). Symbols indicate cells  
622 that have stopped dividing in the presence of drug over 24 h. On average, strain AM2 formed  
623 fewer microcolonies than strain SC5314, but these were larger than those formed by SC5314.  
624 Time lapse videos are available as Supplementary videos 1-4. (c,d) Growth rate analysis of  
625 cells growing at supra-MIC FLC (10  $\mu\text{g}/\text{ml}$ ) during 0-5 h (c) and 10-15 h (d). (e) Schematic of  
626 ScanLag analysis<sup>75</sup> that measures time of colony appearance (ToA), colony growth rate and  
627 colony size using desktop scanners. (f) ToA on medium without drug (blue) or with 10  $\mu\text{g}/\text{ml}$   
628 FLC (red) for resistant isolate T101, and isolates with different FoG levels. Graphs show the  
629 number of colonies (y-axis) at each time point (x-axis). Additional isolates are included in  
630 Supplementary Fig. 4. (g) Correlation between FoG<sub>20</sub> and the difference ( $\Delta$ ) in the ToA of  
631 colonies in the presence vs absence of FLC ( $\Delta\text{ToA} = \text{ToA with FLC} - \text{ToA without FLC}$ ). (g)  
632 Cells that grow within the zone of inhibition are viable, as seen by replica plating of disk diffusion  
633 assays grown on casitone without FLC and incubated at 30°C for 48 h.

634

635 **Figure 3.** Uptake, efflux and steady state intracellular concentrations of FLC-Cy5. (a) Average  
636 intracellular FLC-Cy5 uptake per cell. Uptake curves for 0-5 h and for steady state FLC-Cy5 per  
637 cell at 24 h measured by flow cytometry. (b,c) Correlation between FoG<sub>20</sub> and uptake rate of  
638 FLC-Cy5 between 0.5-1.5h (b) and intracellular FLC-Cy5 at 24 h (c). (d) Intracellular FLC-Cy5  
639 fluorescent intensity at 24 h for four strains with similar MIC and diverse FoG levels (left) and for  
640 the resistant strain T101 (right) normalized for number of cells (n= 15863 for P87, 15075 of P78,

641 22406 for SC5314, 18186 of GC75 ); (e) The proportion of cells (%) with FLC-Cy5 levels at 24 h  
642 was divided into thirds: Low (391-422 A.U.), Mid (3912-34643 A.U.) and High ( $3.5 \times 10^4$ - $3.14 \times 10^5$   
643 A.U.) (upper panel). Proportion of cells (%) with high (lower left panel) or mid (lower right panel)  
644 intracellular FLC-Cy5 concentration at 24 h vs FoG<sub>20</sub> levels of the strains. (f) Efflux of  
645 Rhodamine 6G (R6G) normalized by culture density (OD<sub>600</sub>). Efflux curves represent data from  
646 one (of two) experiments and the curves show fluorescence intensity recorded over 90 min and  
647 calculated as follows:  $\Delta[\text{FLC}(\text{with Glucose} - \text{without Glucose}) - \text{No drug}(\text{with Glucose} - \text{without}$   
648  $\text{Glucose})]$ . (g) Cartoon illustrates the steady state drug levels in cells with high to low FoG  
649 levels.

650

651 **Figure 4.** Adjuvant drugs significantly reduce FLC tolerance but not resistance and render FLC  
652 cidal. (a) Disk diffusion assays performed with 25 µg FLC on casitone plates supplemented with  
653 adjuvant drugs 20 µg/ml fluoxetine, 5 ng/ml aureobasidin A, 0.5 ng/ml rapamycin, 10 µg/ml  
654 fluphenazine, 12.5 ng/ml staurosporine, 0.25 µg/ml Tunicamycin, Hsp90 inhibitors (0.5 µg/ml  
655 geldanamycin and 0.5 µg/ml radicicol) and calcineurin inhibitors (0.5 µg/ml FK506 and 0.4 µg/ml  
656 cyclosporine A) shown for strain SC5314. (b) RAD and FoG levels performed on disk diffusion  
657 assays with FLC and adjuvants. (c) Effect of drug adjuvants and pathways inhibitors on the  
658 viability of cells growing inside the zone of inhibition. FLC disk diffusion assays of SC5314  
659 without or with adjuvant were replica plated (after removal of the drug disk) onto casitone plates  
660 (without FLC or adjuvants) and incubated at 30°C for 48 h. (d,e) FLC disk diffusion assays  
661 performed using a series of mutants carrying deletions in gene encoding the calcineurin subunit  
662 Cnb1, the calcineurin responsive transcription factor Crz1, calcineurin regulators Rcn1 and  
663 Rcn2, MAP kinase Mkc1, vacuolar trafficking protein Vps21 (d), ergosterol biosynthesis  
664 regulator Upc2, and efflux pump regulators Tac1 and Mrr1 (e). These mutants as well as the  
665 *rcn1 crz1* double mutant were analyzed by *diskImageR*, and RAD and FoG levels are shown  
666 relative to the isogenic parental strains. All pictures in this figure are representative of two

667 biological replicates, asterisks denote significant differences relative to corresponding parental  
668 strains,  $P < 0.05$ .

669

670 **Figure 5.** Combination therapy partially rescues systemic infection of *G. mellonella* by high  
671 FoG *C. albicans* isolates. (a) *G. mellonella* larvae were injected with  $3 \times 10^5$  yeast cells/larvae  
672 followed by a second injection with either PBS, FLC alone or FLC and FNZ within 90 min after  
673 the first injection. (b-d) Survival curves of larvae infected with SC5314, low FoG (c) and high  
674 FoG (d) isogenic derivatives. Each curve represents a group of 24 larvae which were monitored  
675 daily for survival for up to 14 days after infection.  $P$  values represent results of log-rank test  
676 comparing different treatment conditions with significance values as follows: \*,  $P < 0.05$ ; \*\*,  $P <$   
677 0.01; \*\*\*,  $P < 0.001$ .

678

679 **Figure 6.** FoG and SMG levels differ between persistent and non-persistent isolates. (a) *C.*  
680 *albicans* isolates from bloodstream infections were either efficiently cleared by a single course  
681 of FLC treatment (non-persistent) or persisted in the host despite multiple rounds of FLC  
682 therapy. (b) FoG and RAD levels for drug-susceptible (S,  $n = 4$ ) isolates SC5314, GC75,  
683 P78042 and P87, resistant (R,  $n = 1$ ) isolate P60002<sup>31</sup>, non-persistent isolates (NP,  $n = 7$ ) and  
684 the first patient isolate from each of the series of clinically persistent strains (P,  $n = 12$ ). The  
685 final isolate of the S03 series of persistent strains had become FLC-resistant (MIC > 128  $\mu\text{g/ml}$ ,  
686 Supplementary Fig. 10a), therefore the penultimate isolate, which remained susceptible, was  
687 used across analyses. Asterisks indicate significant differences between persistent and non-  
688 persistent isolates (t-test,  $P < 0.001$ ). (c) Broth microdilution assays showing MIC and SMG  
689 levels at 24 and 48 h for the susceptible control strains, the non-persistent isolates as in (b) and  
690 for both the initial and final isolates for each of the 12 clinically persistent series (S01-12). The  
691 final isolate in S03 became FLC resistant (R), therefore the penultimate isolate in this series

692 was included as well. Asterisks indicate significant differences between persistent and non-  
693 persistent isolates (t-test,  $P < 0.001$ ).

694

## 695 **References**

- 696 1. CLSI. Performance Standards for Antimicrobial Susceptibility Testing. *CLSI supplement*  
697 *M100* (2017).
- 698 2. Brauner, A., Fridman, O., Gefen, O. & Balaban, N.Q. Distinguishing between resistance,  
699 tolerance and persistence to antibiotic treatment. *Nat Rev Microbiol* **14**, 320-30 (2016).
- 700 3. Coenye, T., De Vos, M., Vandenbosch, D. & Nelis, H. Factors influencing the trailing  
701 endpoint observed in *Candida albicans* susceptibility testing using the CLSI procedure.  
702 *Clin Microbiol Infect* **14**, 495-7 (2008).
- 703 4. Marcos-Zambrano, L.J., Escribano, P., Sanchez-Carrillo, C., Bouza, E. & Guinea, J.  
704 Scope and frequency of fluconazole trailing assessed using EUCAST in invasive  
705 *Candida* spp. isolates. *Med Mycol* **54**, 733-9 (2016).
- 706 5. Pfaller, M.A. & Diekema, D.J. Progress in antifungal susceptibility testing of *Candida*  
707 spp. by use of Clinical and Laboratory Standards Institute broth microdilution methods,  
708 2010 to 2012. *J Clin Microbiol* **50**, 2846-56 (2012).
- 709 6. Rex, J.H. & Pfaller, M.A. Has antifungal susceptibility testing come of age? *Clin Infect*  
710 *Dis* **35**, 982-9 (2002).
- 711 7. Pfaller, M.A. *et al.* Wild-type MIC distributions and epidemiological cutoff values for  
712 amphotericin B, flucytosine, and itraconazole and *Candida* spp. as determined by CLSI  
713 broth microdilution. *J Clin Microbiol* **50**, 2040-6 (2012).
- 714 8. Alexander, B.D. *et al.* Increasing echinocandin resistance in *Candida glabrata*: clinical  
715 failure correlates with presence of FKS mutations and elevated minimum inhibitory  
716 concentrations. *Clin Infect Dis* **56**, 1724-32 (2013).

- 717 9. Doern, G.V. & Brecher, S.M. The Clinical Predictive Value (or Lack Thereof) of the  
718 Results of In Vitro Antimicrobial Susceptibility Tests. *Journal of Clinical Microbiology*  
719 **49**(2011).
- 720 10. Delarze, E. & Sanglard, D. Defining the frontiers between antifungal resistance,  
721 tolerance and the concept of persistence. *Drug Resist Updat* **23**, 12-19 (2015).
- 722 11. Balaban, N.Q., Gerdes, K., Lewis, K. & McKinney, J.D. A problem of persistence: still  
723 more questions than answers? *Nat Rev Microbiol* **11**, 587-91 (2013).
- 724 12. Da Matta, D.A. *et al.* Multilocus sequence typing of sequential *Candida albicans* isolates  
725 from patients with persistent or recurrent fungemia. *Med Mycol* **48**, 757-62 (2010).
- 726 13. Whaley, S.G. *et al.* Azole Antifungal Resistance in *Candida albicans* and Emerging Non-  
727 *albicans* *Candida* Species. *Front Microbiol* **7**, 2173 (2016).
- 728 14. Robbins, N., Caplan, T. & Cowen, L.E. Molecular Evolution of Antifungal Drug  
729 Resistance. *Annu Rev Microbiol* **71**, 753-775 (2017).
- 730 15. Cowen, L.E., Carpenter, A.E., Matangkasombut, O., Fink, G.R. & Lindquist, S. Genetic  
731 architecture of Hsp90-dependent drug resistance. *Eukaryot Cell* **5**, 2184-8 (2006).
- 732 16. Youngsaye, W. *et al.* Overcoming fluconazole resistance in *Candida albicans* clinical  
733 isolates with tetracyclic indoles. *Bioorg Med Chem Lett* **22**, 3362-5 (2012).
- 734 17. Blankenship, J.R., Steinbach, W.J., Perfect, J.R. & Heitman, J. Teaching old drugs new  
735 tricks: reincarnating immunosuppressants as antifungal drugs. *Curr Opin Investig Drugs*  
736 **4**, 192-9 (2003).
- 737 18. Kim, A. & Cunningham, K.W. A LAPF/phafin1-like protein regulates TORC1 and  
738 lysosomal membrane permeabilization in response to endoplasmic reticulum membrane  
739 stress. *Mol Biol Cell* **26**, 4631-45 (2015).
- 740 19. Fiori, A. & Van Dijck, P. Potent synergistic effect of doxycycline with fluconazole against  
741 *Candida albicans* is mediated by interference with iron homeostasis. *Antimicrob Agents*  
742 *Chemother* **56**, 3785-96 (2012).

- 743 20. Zhong, W., Jeffries, M.W. & Georgopapadakou, N.H. Inhibition of inositol  
744 phosphorylceramide synthase by aureobasidin A in *Candida* and *Aspergillus* species.  
745 *Antimicrob Agents Chemother* **44**, 651-3 (2000).
- 746 21. Gu, W., Guo, D., Zhang, L., Xu, D. & Sun, S. The Synergistic Effect of Azoles and  
747 Fluoxetine against Resistant *Candida albicans* Strains Is Attributed to Attenuating  
748 Fungal Virulence. *Antimicrob Agents Chemother* **60**, 6179-88 (2016).
- 749 22. Cruz, M.C. *et al.* Rapamycin and less immunosuppressive analogs are toxic to *Candida*  
750 *albicans* and *Cryptococcus neoformans* via FKBP12-dependent inhibition of TOR.  
751 *Antimicrob Agents Chemother* **45**, 3162-70 (2001).
- 752 23. Henry, K.W., Cruz, M.C., Katiyar, S.K. & Edlind, T.D. Antagonism of azole activity  
753 against *Candida albicans* following induction of multidrug resistance genes by selected  
754 antimicrobial agents. *Antimicrob Agents Chemother* **43**, 1968-74 (1999).
- 755 24. Robbins, N., Wright, G.D. & Cowen, L.E. Antifungal Drugs: The Current Armamentarium  
756 and Development of New Agents. *Microbiol Spectr* **4**(2016).
- 757 25. Geiler-Samerotte, K.A., Zhu, Y.O., Goulet, B.E., Hall, D.W. & Siegal, M.L. Selection  
758 Transforms the Landscape of Genetic Variation Interacting with Hsp90. *PLoS Biol* **14**,  
759 e2000465 (2016).
- 760 26. Jarosz, D.F. & Lindquist, S. Hsp90 and environmental stress transform the adaptive  
761 value of natural genetic variation. *Science* **330**, 1820-4 (2010).
- 762 27. Cowen, L.E. *et al.* Harnessing Hsp90 function as a powerful, broadly effective  
763 therapeutic strategy for fungal infectious disease. *Proc Natl Acad Sci U S A* **106**, 2818-  
764 23 (2009).
- 765 28. Sanglard, D., Ischer, F., Marchetti, O., Entenza, J. & Bille, J. Calcineurin A of *Candida*  
766 *albicans*: involvement in antifungal tolerance, cell morphogenesis and virulence.  
767 *Molecular microbiology* **48**, 959-976 (2003).

- 768 29. Coste, A.T., Karababa, M., Ischer, F., Bille, J. & Sanglard, D. TAC1, transcriptional  
769 activator of CDR genes, is a new transcription factor involved in the regulation of  
770 *Candida albicans* ABC transporters CDR1 and CDR2. *Eukaryot Cell* **3**, 1639-52 (2004).
- 771 30. Zhai, B., Wu, C., Wang, L., Sachs, M.S. & Lin, X. The antidepressant sertraline provides  
772 a promising therapeutic option for neurotropic cryptococcal infections. *Antimicrob Agents*  
773 *Chemother* **56**, 3758-66 (2012).
- 774 31. Pfaller, M.A. & Diekema, D.J. Epidemiology of invasive candidiasis: a persistent public  
775 health problem. *Clinical microbiology reviews* **20**, 133-163 (2007).
- 776 32. Chapman, R.L. & Faix, R.G. Persistently positive cultures and outcome in invasive  
777 neonatal candidiasis. *Pediatr Infect Dis J* **19**, 822-7 (2000).
- 778 33. Hammoud, M.S., Al-Taiar, A., Fouad, M., Raina, A. & Khan, Z. Persistent candidemia in  
779 neonatal care units: risk factors and clinical significance. *Int J Infect Dis* **17**, e624-8  
780 (2013).
- 781 34. Arendrup, M.C., Cuenca-Estrella, M., Lass-Flörl, C., Hope, W. & Eucast, A. EUCAST  
782 technical note on the EUCAST definitive document EDef 7.2: method for the  
783 determination of broth dilution minimum inhibitory concentrations of antifungal agents for  
784 yeasts EDef 7.2 (EUCAST-AFST). *Clin Microbiol Infect* **18**, E246-7 (2012).
- 785 35. Arthington-Skaggs, B.A. *et al.* Comparison of visual and spectrophotometric methods of  
786 broth microdilution MIC end point determination and evaluation of a sterol quantitation  
787 method for in vitro susceptibility testing of fluconazole and itraconazole against trailing  
788 and nontrailing *Candida* isolates. *Antimicrob Agents Chemother* **46**, 2477-81 (2002).
- 789 36. Nicholas, R.O. & Kerridge, D. Correlation of inhibition of sterol synthesis with growth-  
790 inhibitory action of imidazole antimycotics in *Candida albicans*. *J Antimicrob Chemother*  
791 **23**, 7-19 (1989).

- 792 37. Rodriguez-Tudela, J.L. & Martinez-Suarez, J.V. Defining conditions for microbroth  
793 antifungal susceptibility tests: influence of RPMI and RPMI-2% glucose on the selection  
794 of endpoint criteria. *J Antimicrob Chemother* **35**, 739-49 (1995).
- 795 38. Luna-Tapia, A., Kerns, M.E., Eberle, K.E., Jursic, B.S. & Palmer, G.E. Trafficking  
796 through the late endosome significantly impacts *Candida albicans* tolerance of the azole  
797 antifungals. *Antimicrob Agents Chemother* **59**, 2410-20 (2015).
- 798 39. Whaley, S.G. *et al.* The RTA3 Gene, Encoding a Putative Lipid Translocase, Influences  
799 the Susceptibility of *Candida albicans* to Fluconazole. *Antimicrob Agents Chemother* **60**,  
800 6060-6 (2016).
- 801 40. Tscherner, M. *et al.* The *Candida albicans* Histone Acetyltransferase Hat1 Regulates  
802 Stress Resistance and Virulence via Distinct Chromatin Assembly Pathways. *PLoS*  
803 *Pathog* **11**, e1005218 (2015).
- 804 41. Xu, D., Cheng, J., Cao, C., Wang, L. & Jiang, L. Genetic interactions between Rch1 and  
805 the high-affinity calcium influx system Cch1/Mid1/Ecm7 in the regulation of calcium  
806 homeostasis, drug tolerance, hyphal development and virulence in *Candida albicans*.  
807 *FEMS Yeast Res* **15**(2015).
- 808 42. Nagao, J. *et al.* *Candida albicans* Msi3p, a homolog of the *Saccharomyces cerevisiae*  
809 Sse1p of the Hsp70 family, is involved in cell growth and fluconazole tolerance. *FEMS*  
810 *Yeast Res* **12**, 728-37 (2012).
- 811 43. Rueda, C. *et al.* Evaluation of the possible influence of trailing and paradoxical effects on  
812 the clinical outcome of patients with candidemia. *Clin Microbiol Infect* **23**, 49 e1-49 e8  
813 (2017).
- 814 44. Chang, T.P. *et al.* Distribution and drug susceptibilities of *Candida* species causing  
815 candidemia from a medical center in central Taiwan. *J Infect Chemother* **19**, 1065-71  
816 (2013).



- 817 45. Rex, J.H. *et al.* Optimizing the correlation between results of testing in vitro and  
818 therapeutic outcome in vivo for fluconazole by testing critical isolates in a murine model  
819 of invasive candidiasis. *Antimicrob Agents Chemother* **42**, 129-34 (1998).
- 820 46. Arthington-Skaggs, B.A., Warnock, D.W. & Morrison, C.J. Quantitation of *Candida*  
821 *albicans* ergosterol content improves the correlation between in vitro antifungal  
822 susceptibility test results and in vivo outcome after fluconazole treatment in a murine  
823 model of invasive candidiasis. *Antimicrob Agents Chemother* **44**, 2081-5 (2000).
- 824 47. Peters, B.M. *et al.* An Azole-Tolerant Endosomal Trafficking Mutant of *Candida albicans*  
825 Is Susceptible to Azole Treatment in a Mouse Model of Vaginal Candidiasis. *Antimicrob*  
826 *Agents Chemother* **61**(2017).
- 827 48. Revankar, S.G. *et al.* Interpretation of trailing endpoints in antifungal susceptibility testing  
828 by the National Committee for Clinical Laboratory Standards method. *J Clin Microbiol* **36**,  
829 153-6 (1998).
- 830 49. Agrawal, D., Patterson, T.F., Rinaldi, M.G. & Revankar, S.G. Trailing end-point  
831 phenotype of *Candida* spp. in antifungal susceptibility testing to fluconazole is eliminated  
832 by altering incubation temperature. *J Med Microbiol* **56**, 1003-4 (2007).
- 833 50. Marr, K.A., Rustad, T.R., Rex, J.H. & White, T.C. The trailing end point phenotype in  
834 antifungal susceptibility testing is pH dependent. *Antimicrob Agents Chemother* **43**,  
835 1383-6 (1999).
- 836 51. Singh, S.D. *et al.* Hsp90 governs echinocandin resistance in the pathogenic yeast  
837 *Candida albicans* via calcineurin. *PLoS Pathog* **5**, e1000532 (2009).
- 838 52. Cannon, R.D. *et al.* *Candida albicans* drug resistance another way to cope with stress.  
839 *Microbiology (Reading, England)* **153**, 3211-3217 (2007).
- 840 53. Karababa, M. *et al.* CRZ1, a target of the calcineurin pathway in *Candida albicans*.  
841 *Molecular microbiology* **59**, 1429-1451 (2006).

- 842 54. LaFleur, M.D., Kumamoto, C.A. & Lewis, K. Candida albicans biofilms produce  
843 antifungal-tolerant persister cells. *Antimicrob Agents Chemother* **50**, 3839-46 (2006).
- 844 55. Onyewu, C., Wormley, F.L., Jr., Perfect, J.R. & Heitman, J. The calcineurin target, Crz1,  
845 functions in azole tolerance but is not required for virulence of Candida albicans.  
846 *Infection and immunity* **72**, 7330-7333 (2004).
- 847 56. Bonhomme, J. & d'Enfert, C. Candida albicans biofilms: building a heterogeneous, drug-  
848 tolerant environment. *Current opinion in microbiology* (2013).
- 849 57. Weil, T. *et al.* Adaptive Mistranslation Accelerates the Evolution of Fluconazole  
850 Resistance and Induces Major Genomic and Gene Expression Alterations in Candida  
851 albicans. *mSphere* **2**(2017).
- 852 58. Vincent, B.M. *et al.* A Fungal-Selective Cytochrome bc1 Inhibitor Impairs Virulence and  
853 Prevents the Evolution of Drug Resistance. *Cell Chem Biol* **23**, 978-991 (2016).
- 854 59. Hameed, S., Dhamgaye, S., Singh, A., Goswami, S.K. & Prasad, R. Calcineurin  
855 signaling and membrane lipid homeostasis regulates iron mediated multidrug resistance  
856 mechanisms in Candida albicans. *PLoS One* **6**, e18684 (2011).
- 857 60. Juvvadi, P.R., Lee, S.C., Heitman, J. & Steinbach, W.J. Calcineurin in fungal virulence  
858 and drug resistance: Prospects for harnessing targeted inhibition of calcineurin for an  
859 antifungal therapeutic approach. *Virulence* **8**, 186-197 (2017).
- 860 61. Cowen, L.E. & Lindquist, S. Hsp90 potentiates the rapid evolution of new traits: drug  
861 resistance in diverse fungi. *Science* **309**, 2185-9 (2005).
- 862 62. Tavanti, A., Gow, N.A., Senesi, S., Maiden, M.C. & Odds, F.C. Optimization and  
863 validation of multilocus sequence typing for Candida albicans. *J Clin Microbiol* **41**, 3765-  
864 76 (2003).
- 865 63. MacCallum, D.M. *et al.* Property differences among the four major Candida albicans  
866 strain clades. *Eukaryot Cell* **8**, 373-87 (2009).

- 867 64. McManus, B.A. & Coleman, D.C. Molecular epidemiology, phylogeny and evolution of  
868 *Candida albicans*. *Infect Genet Evol* **21**, 166-78 (2014).
- 869 65. Gerstein, A.C., Rosenberg, A., Hecht, I. & Berman, J. diskImageR: quantification of  
870 resistance and tolerance to antimicrobial drugs using disk diffusion assays. *Microbiology*  
871 **162**, 1059-68 (2016).
- 872 66. Sanglard, D., Ischer, F., Marchetti, O., Entenza, J. & Bille, J. Calcineurin A of *Candida*  
873 *albicans*: involvement in antifungal tolerance, cell morphogenesis and virulence. *Mol*  
874 *Microbiol* **48**, 959-76 (2003).
- 875 67. Marchetti, O., Moreillon, P., Glauser, M.P., Bille, J. & Sanglard, D. Potent synergism of  
876 the combination of fluconazole and cyclosporine in *Candida albicans*. *Antimicrob Agents*  
877 *Chemother* **44**, 2373-81 (2000).
- 878 68. Alp, S., Sancak, B., Hascelik, G. & Arikan, S. Influence of different susceptibility testing  
879 methods and media on determination of the relevant fluconazole minimum inhibitory  
880 concentrations for heavy trailing *Candida* isolates with low-high phenotype. *Mycoses* **53**,  
881 475-80 (2010).
- 882 69. Vandebossche, I., Vaneechoutte, M., Vandevenne, M., De Baere, T. & Verschraegen,  
883 G. Susceptibility testing of fluconazole by the NCCLS broth macrodilution method, E-  
884 test, and disk diffusion for application in the routine laboratory. *J Clin Microbiol* **40**, 918-  
885 21 (2002).
- 886 70. Pfaller, M.A. *et al.* Comparison of results of fluconazole disk diffusion testing for *Candida*  
887 species with results from a central reference laboratory in the ARTEMIS global  
888 antifungal surveillance program. *J Clin Microbiol* **42**, 3607-12 (2004).
- 889 71. Zomorodian, K. *et al.* In Vitro Susceptibility and Trailing Growth Effect of Clinical Isolates  
890 of *Candida* Species to Azole Drugs. *Jundishapur J Microbiol* **9**, e28666 (2016).
- 891 72. Levy, S.F., Ziv, N. & Siegal, M.L. Bet hedging in yeast by heterogeneous, age-correlated  
892 expression of a stress protectant. *PLoS Biol* **10**, e1001325 (2012).

- 893 73. Harrison, B.D. *et al.* A tetraploid intermediate precedes aneuploid formation in yeasts  
894 exposed to fluconazole. *PLoS Biol* **12**, e1001815 (2014).
- 895 74. Levin-Reisman, I., Fridman, O. & Balaban, N.Q. ScanLag: high-throughput quantification  
896 of colony growth and lag time. *J Vis Exp* (2014).
- 897 75. Levin-Reisman, I. & Balaban, N.Q. Quantitative Measurements of Type I and Type II  
898 Persisters Using ScanLag. *Methods Mol Biol* **1333**, 75-81 (2016).
- 899 76. Fridman, O., Goldberg, A., Ronin, I., Shores, N. & Balaban, N.Q. Optimization of lag  
900 time underlies antibiotic tolerance in evolved bacterial populations. *Nature* **513**, 418-21  
901 (2014).
- 902 77. Balaban, N.Q., Merrin, J., Chait, R., Kowalik, L. & Leibler, S. Bacterial persistence as a  
903 phenotypic switch. *Science* **305**, 1622-5 (2004).
- 904 78. Alby, K. & Bennett, R.J. Stress-induced phenotypic switching in *Candida albicans*.  
905 *Molecular biology of the cell* **20**, 3178-3191 (2009).
- 906 79. Bensen, E.S., Clemente-Blanco, A., Finley, K.R., Correa-Bordes, J. & Berman, J. The  
907 mitotic cyclins Clb2p and Clb4p affect morphogenesis in *Candida albicans*. *Mol Biol Cell*  
908 **16**, 3387-400 (2005).
- 909 80. Bull, J.J., Vegge, C.S., Schmerer, M., Chaudhry, W.N. & Levin, B.R. Phenotypic  
910 resistance and the dynamics of bacterial escape from phage control. *PLoS One* **9**,  
911 e94690 (2014).
- 912 81. Benhamou, R.I. *et al.* Real-Time Imaging of the Azole Class of Antifungal Drugs in Live  
913 *Candida* Cells. *ACS Chem Biol* **12**, 1769-1777 (2017).
- 914 82. Ben-Ami, R. *et al.* Heteroresistance to Fluconazole Is a Continuously Distributed  
915 Phenotype among *Candida glabrata* Clinical Strains Associated with In Vivo Persistence.  
916 *MBio* **7**(2016).
- 917 83. Veri, A. & Cowen, L.E. Progress and prospects for targeting Hsp90 to treat fungal  
918 infections. *Parasitology* **141**, 1127-1137 (2014).

- 919 84. Shrestha, S.K., Fosso, M.Y. & Garneau-Tsodikova, S. A combination approach to  
920 treating fungal infections. *Sci Rep* **5**, 17070 (2015).
- 921 85. Chaturvedi, V. *et al.* Multilaboratory testing of two-drug combinations of antifungals  
922 against *Candida albicans*, *Candida glabrata*, and *Candida parapsilosis*. *Antimicrob*  
923 *Agents Chemother* **55**, 1543-8 (2011).
- 924 86. Kaneko, Y., Ohno, H., Imamura, Y., Kohno, S. & Miyazaki, Y. The effects of an hsp90  
925 inhibitor on the paradoxical effect. *Jpn J Infect Dis* **62**, 392-3 (2009).
- 926 87. Uppuluri, P., Nett, J., Heitman, J. & Andes, D. Synergistic effect of calcineurin inhibitors  
927 and fluconazole against *Candida albicans* biofilms. *Antimicrob Agents Chemother* **52**,  
928 1127-32 (2008).
- 929 88. Cruz, M.C. *et al.* Calcineurin is essential for survival during membrane stress in *Candida*  
930 *albicans*. *EMBO J* **21**, 546-59 (2002).
- 931 89. Onyewu, C., Blankenship, J.R., Del Poeta, M. & Heitman, J. Ergosterol biosynthesis  
932 inhibitors become fungicidal when combined with calcineurin inhibitors against *Candida*  
933 *albicans*, *Candida glabrata*, and *Candida krusei*. *Antimicrob Agents Chemother* **47**, 956-  
934 64 (2003).
- 935 90. LaFayette, S.L. *et al.* PKC signaling regulates drug resistance of the fungal pathogen  
936 *Candida albicans* via circuitry comprised of Mkc1, calcineurin, and Hsp90. *PLoS Pathog*  
937 **6**, e1001069 (2010).
- 938 91. Chen, S.C., Lewis, R.E. & Kontoyiannis, D.P. Direct effects of non-antifungal agents  
939 used in cancer chemotherapy and organ transplantation on the development and  
940 virulence of *Candida* and *Aspergillus* species. *Virulence* **2**, 280-95 (2011).
- 941 92. Lehle, L. & Tanner, W. The specific site of tunicamycin inhibition in the formation of  
942 dolichol-bound N-acetylglucosamine derivatives. *FEBS Lett* **72**, 167-70 (1976).

- 943 93. Stefan, C.P. & Cunningham, K.W. Kch1 family proteins mediate essential responses to  
944 endoplasmic reticulum stresses in the yeasts *Saccharomyces cerevisiae* and *Candida*  
945 *albicans*. *J Biol Chem* **288**, 34861-70 (2013).
- 946 94. Tkacz, J.S. & Lampen, O. Tunicamycin inhibition of polyisoprenyl N-acetylglucosaminyl  
947 pyrophosphate formation in calf-liver microsomes. *Biochem Biophys Res Commun* **65**,  
948 248-57 (1975).
- 949 95. Cyert, M.S. Genetic analysis of calmodulin and its targets in *Saccharomyces cerevisiae*.  
950 *Annu Rev Genet* **35**, 647-72 (2001).
- 951 96. White, T.C. Increased mRNA levels of ERG16, CDR, and MDR1 correlate with increases  
952 in azole resistance in *Candida albicans* isolates from a patient infected with human  
953 immunodeficiency virus. *Antimicrob Agents Chemother* **41**, 1482-7 (1997).
- 954 97. Redding, S. *et al.* Resistance of *Candida albicans* to fluconazole during treatment of  
955 oropharyngeal candidiasis in a patient with AIDS: documentation by in vitro susceptibility  
956 testing and DNA subtype analysis. *Clin Infect Dis* **18**, 240-2 (1994).
- 957 98. CLSI. Reference method for broth dilution antifungal susceptibility testing of yeasts; 4th  
958 Informational Supplement. *CLSI document M27-S4*. Wayne: *Clinical and Laboratory*  
959 *Standards Institute*; . (2012).
- 960 99. Marchetti, O. *et al.* Fluconazole plus cyclosporine: a fungicidal combination effective  
961 against experimental endocarditis due to *Candida albicans*. *Antimicrob Agents*  
962 *Chemother* **44**, 2932-8 (2000).
- 963 100. Cowen, L.E. & Steinbach, W.J. Stress, drugs, and evolution: the role of cellular signaling  
964 in fungal drug resistance. *Eukaryotic cell* **7**, 747-764 (2008).
- 965 101. Reedy, J.L., Filler, S.G. & Heitman, J. Elucidating the *Candida albicans* calcineurin  
966 signaling cascade controlling stress response and virulence. *Fungal Genet Biol* **47**, 107-  
967 16 (2010).

- 968 102. Edlind, T., Smith, L., Henry, K., Katiyar, S. & Nickels, J. Antifungal activity in  
969 *Saccharomyces cerevisiae* is modulated by calcium signalling. *Mol Microbiol* **46**, 257-68  
970 (2002).
- 971 103. Colombo, A.L., de Almeida Junior, J.N., Slavin, M.A., Chen, S.C. & Sorrell, T.C. Candida  
972 and invasive mould diseases in non-neutropenic critically ill patients and patients with  
973 haematological cancer. *Lancet Infect Dis* (2017).
- 974 104. Nucci, M. *et al.* Epidemiology of candidemia in Latin America: a laboratory-based survey.  
975 *PLoS One* **8**, e59373 (2013).
- 976 105. Reboli, A.C. *et al.* Anidulafungin versus fluconazole for invasive candidiasis. *N Engl J*  
977 *Med* **356**, 2472-82 (2007).
- 978 106. Andes, D.R. *et al.* Impact of treatment strategy on outcomes in patients with candidemia  
979 and other forms of invasive candidiasis: a patient-level quantitative review of randomized  
980 trials. *Clin Infect Dis* **54**, 1110-22 (2012).
- 981 107. Braga-Silva, L.A. *et al.* Trailing end-point phenotype antibiotic-sensitive strains of  
982 *Candida albicans* produce different amounts of aspartyl peptidases. *Braz J Med Biol Res*  
983 **42**, 765-70 (2009).
- 984 108. Shapiro, R.S., Zaas, A.K., Betancourt-Quiroz, M., Perfect, J.R. & Cowen, L.E. The  
985 Hsp90 co-chaperone Sgt1 governs *Candida albicans* morphogenesis and drug  
986 resistance. *PLoS One* **7**, e44734 (2012).
- 987 109. Prasad, R., Rawal, M.K. & Shah, A.H. Candida Efflux ATPases and Antiporters in  
988 Clinical Drug Resistance. *Adv Exp Med Biol* **892**, 351-376 (2016).
- 989 110. Nim, S. *et al.* Overcoming Multidrug Resistance in *Candida albicans*: Macrocyclic  
990 Diterpenes from *Euphorbia* Species as Potent Inhibitors of Drug Efflux Pumps. *Planta*  
991 *Med* **82**, 1180-5 (2016).
- 992 111. Holmes, A.R. *et al.* Targeting efflux pumps to overcome antifungal drug resistance.  
993 *Future Med Chem* **8**, 1485-501 (2016).

- 994 112. Cowen, L.E., Sanglard, D., Howard, S.J., Rogers, P.D. & Perlin, D.S. Mechanisms of  
995 Antifungal Drug Resistance. *Cold Spring Harbor Perspectives in Medicine* **5**(2015).
- 996 113. Prasad, R. & Rawal, M.K. Efflux pump proteins in antifungal resistance. *Front Pharmacol*  
997 **5**, 202 (2014).
- 998 114. Schubert, S. *et al.* Regulation of efflux pump expression and drug resistance by the  
999 transcription factors Mrr1, Upc2, and Cap1 in *Candida albicans*. *Antimicrob Agents*  
1000 *Chemother* **55**, 2212-23 (2011).
- 1001 115. Morschhauser, J. *et al.* The transcription factor Mrr1p controls expression of the MDR1  
1002 efflux pump and mediates multidrug resistance in *Candida albicans*. *PLoS Pathog* **3**,  
1003 e164 (2007).
- 1004 116. Prasad, R., Gaur, N.A., Gaur, M. & Komath, S.S. Efflux pumps in drug resistance of  
1005 *Candida*. *Infect Disord Drug Targets* **6**, 69-83 (2006).
- 1006 117. Akins, R.A. An update on antifungal targets and mechanisms of resistance in *Candida*  
1007 *albicans*. *Med Mycol* **43**, 285-318 (2005).
- 1008 118. Maesaki, S., Marichal, P., Vanden Bossche, H., Sanglard, D. & Kohno, S. Rhodamine  
1009 6G efflux for the detection of CDR1-overexpressing azole-resistant *Candida albicans*  
1010 strains. *J Antimicrob Chemother* **44**, 27-31 (1999).
- 1011 119. Vasicek, E.M. *et al.* Disruption of the transcriptional regulator Cas5 results in enhanced  
1012 killing of *Candida albicans* by Fluconazole. *Antimicrob Agents Chemother* **58**, 6807-18  
1013 (2014).
- 1014 120. Liu, S. *et al.* Synergistic Effect of Fluconazole and Calcium Channel Blockers against  
1015 Resistant *Candida albicans*. *PLoS One* **11**, e0150859 (2016).
- 1016 121. Epp, E. *et al.* Reverse genetics in *Candida albicans* predicts ARF cycling is essential for  
1017 drug resistance and virulence. *PLoS Pathog* **6**, e1000753 (2010).



- 1018 122. Cardenas, M.E., Sanfridson, A., Cutler, N.S. & Heitman, J. Signal-transduction cascades  
1019 as targets for therapeutic intervention by natural products. *Trends Biotechnol* **16**, 427-33  
1020 (1998).
- 1021 123. Elicharova, H. & Sychrova, H. Fluconazole treatment hyperpolarizes the plasma  
1022 membrane of *Candida* cells. *Med Mycol* **51**, 785-94 (2013).
- 1023 124. Kohli, A., Smriti, Mukhopadhyay, K., Rattan, A. & Prasad, R. In vitro low-level resistance  
1024 to azoles in *Candida albicans* is associated with changes in membrane lipid fluidity and  
1025 asymmetry. *Antimicrob Agents Chemother* **46**, 1046-52 (2002).
- 1026 125. Sorgo, A.G. *et al.* Effects of fluconazole on the secretome, the wall proteome, and wall  
1027 integrity of the clinical fungus *Candida albicans*. *Eukaryot Cell* **10**, 1071-81 (2011).
- 1028 126. Saarikangas, J. & Barral, Y. Protein aggregation as a mechanism of adaptive cellular  
1029 responses. *Curr Genet* **62**, 711-724 (2016).
- 1030 127. Corona, F. & Martinez, J.L. Phenotypic Resistance to Antibiotics. *Antibiotics (Basel)* **2**,  
1031 237-55 (2013).
- 1032 128. Nussbaum, J.C. *et al.* Combination flucytosine and high-dose fluconazole compared with  
1033 fluconazole monotherapy for the treatment of cryptococcal meningitis: a randomized trial  
1034 in Malawi. *Clin Infect Dis* **50**, 338-44 (2010).
- 1035 129. Colombo, A.L. *et al.* Prognostic factors and historical trends in the epidemiology of  
1036 candidemia in critically ill patients: an analysis of five multicenter studies sequentially  
1037 conducted over a 9-year period. *Intensive Care Med* **40**, 1489-98 (2014).
- 1038 130. CLSI. Method for Antifungal Disk Diffusion Susceptibility Testing of Yeasts; Approved  
1039 Guideline-Second Edition. *CLSI document M27-S4*. Wayne: *Clinical and Laboratory*  
1040 *Standards Institute* (2009).
- 1041 131. Diezmann, S., Michaut, M., Shapiro, R.S., Bader, G.D. & Cowen, L.E. Mapping the  
1042 Hsp90 genetic interaction network in *Candida albicans* reveals environmental  
1043 contingency and rewired circuitry. *PLoS Genet* **8**, e1002562 (2012).

- 1044 132. Vale-Silva, L.A. *et al.* Azole resistance by loss of function of the sterol Delta(5),(6)-  
1045 desaturase gene (ERG3) in *Candida albicans* does not necessarily decrease virulence.  
1046 *Antimicrob Agents Chemother* **56**, 1960-8 (2012).
- 1047 133. Li, D.D. *et al.* Using *Galleria mellonella*-*Candida albicans* infection model to evaluate  
1048 antifungal agents. *Biol Pharm Bull* **36**, 1482-7 (2013).
- 1049 134. Ziv, N., Siegal, M.L. & Gresham, D. Genetic and nongenetic determinants of cell growth  
1050 variation assessed by high-throughput microscopy. *Mol Biol Evol* **30**, 2568-78 (2013).  
1051  
1052

# Figure 1

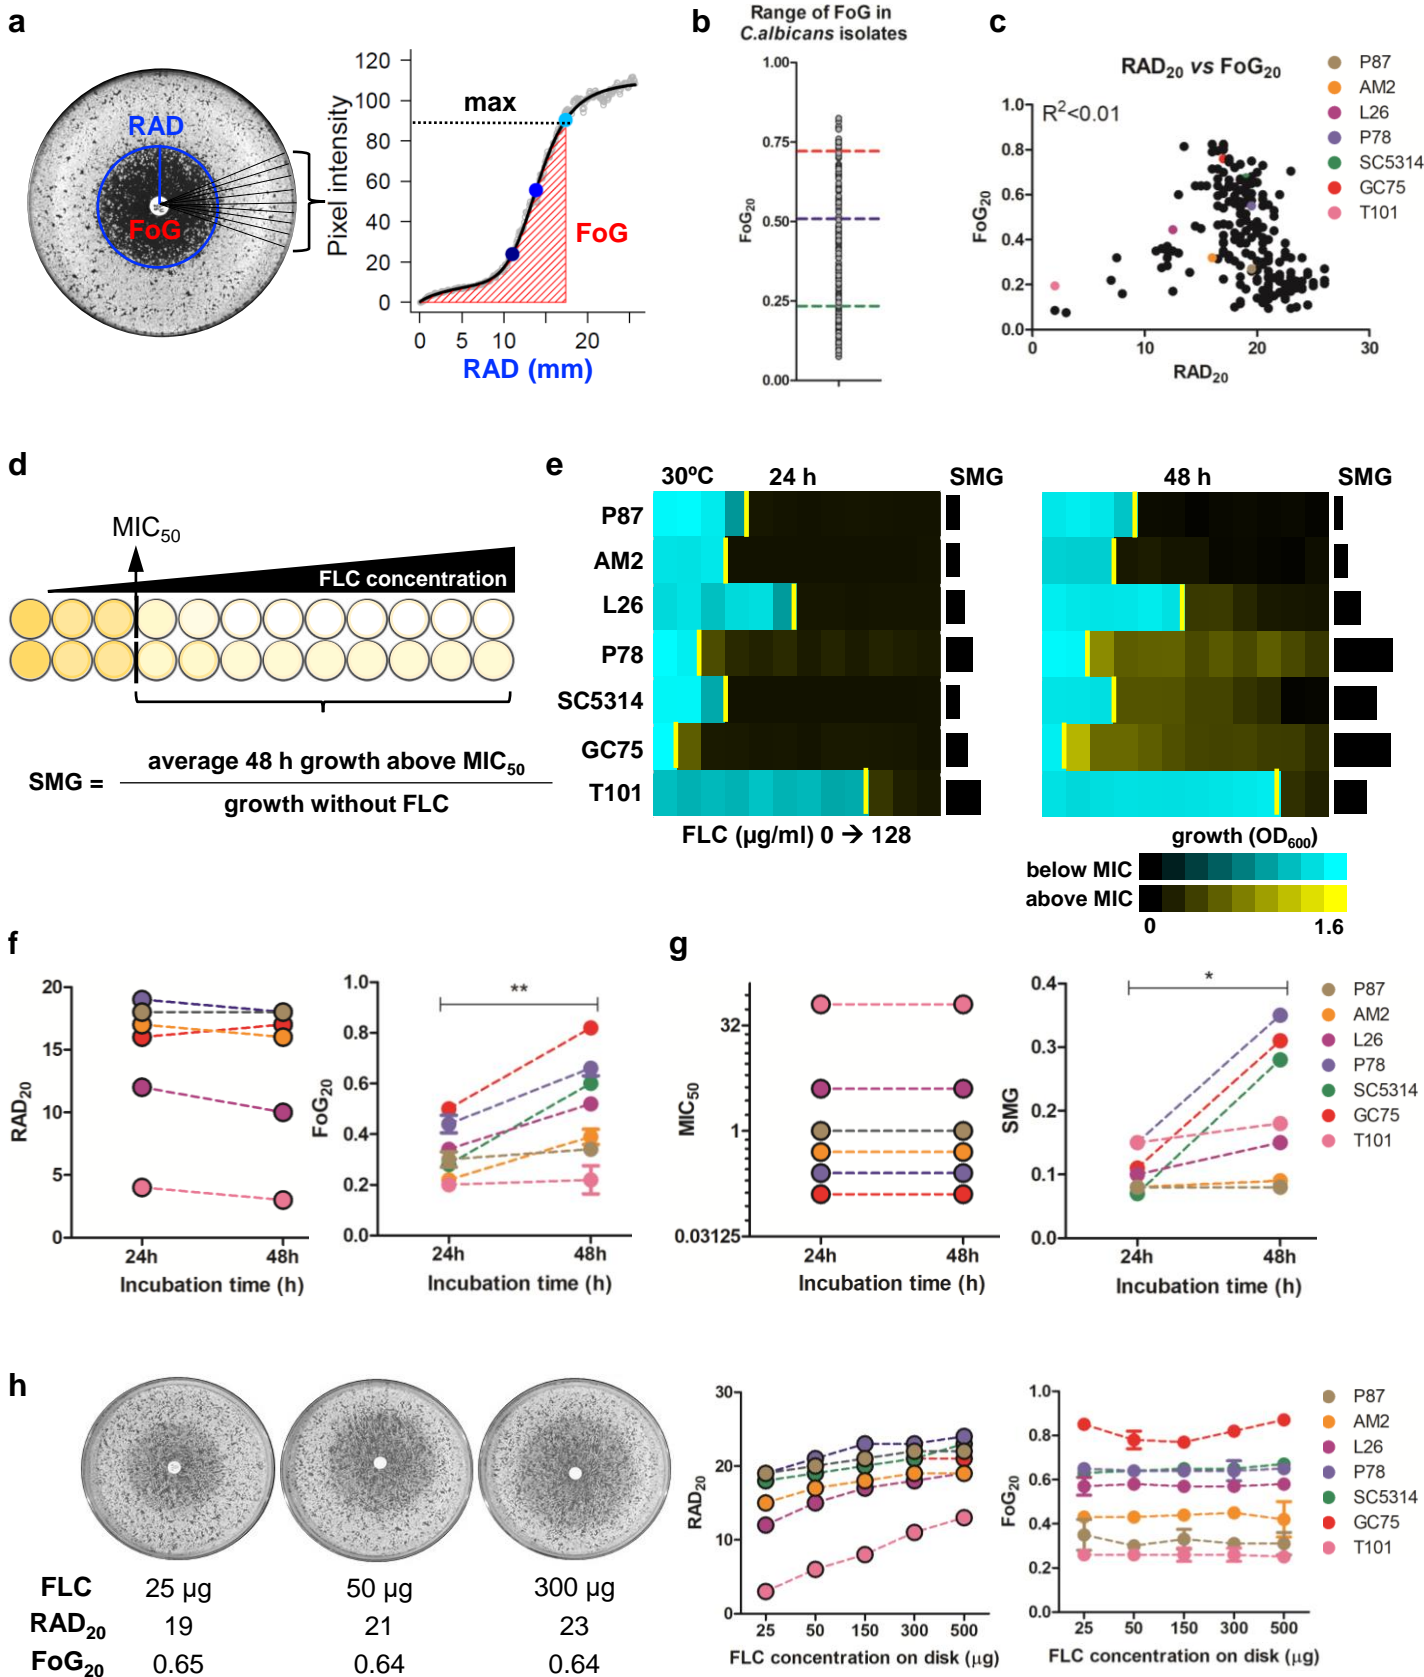

## Figure 2

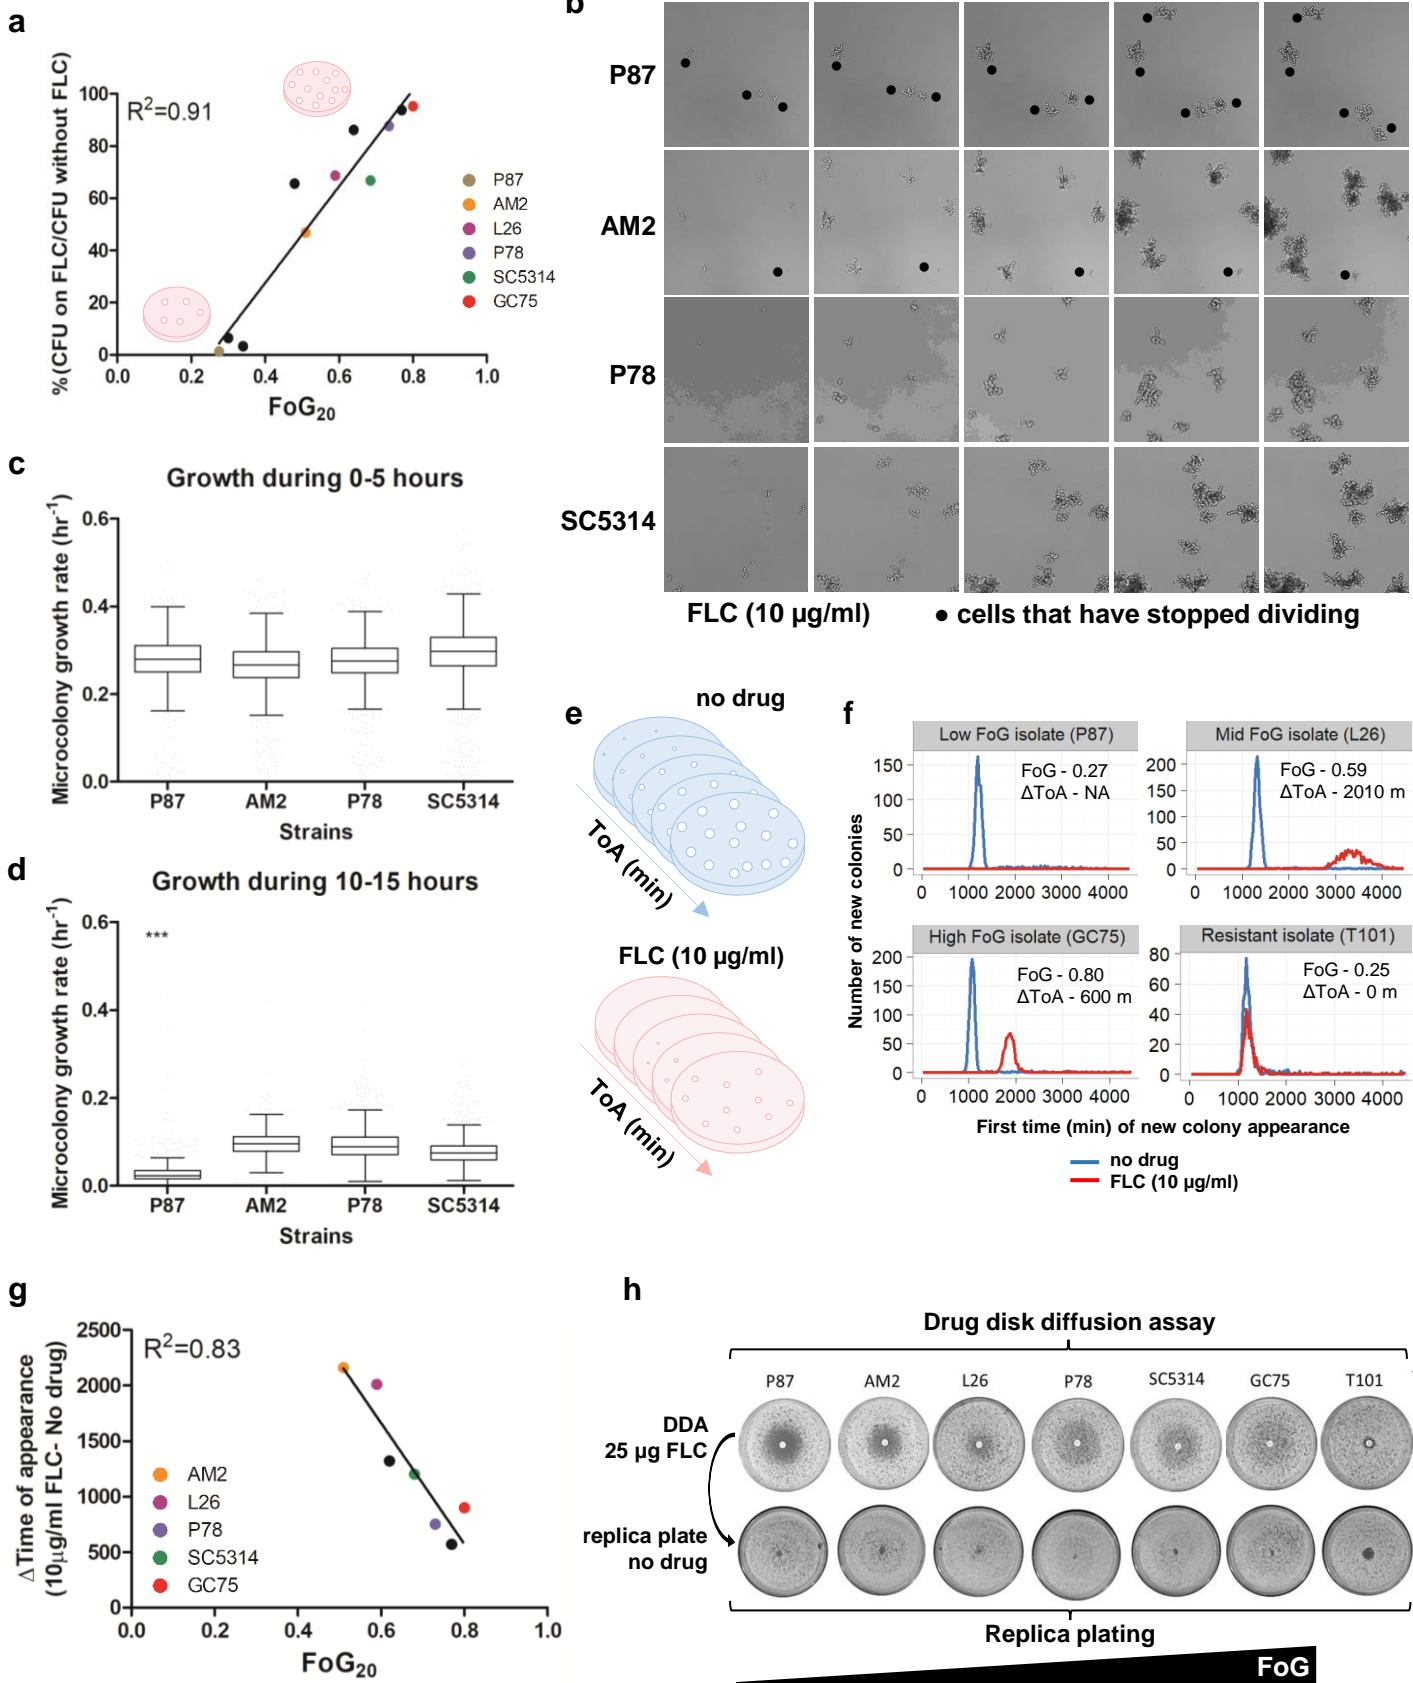

### Figure 3

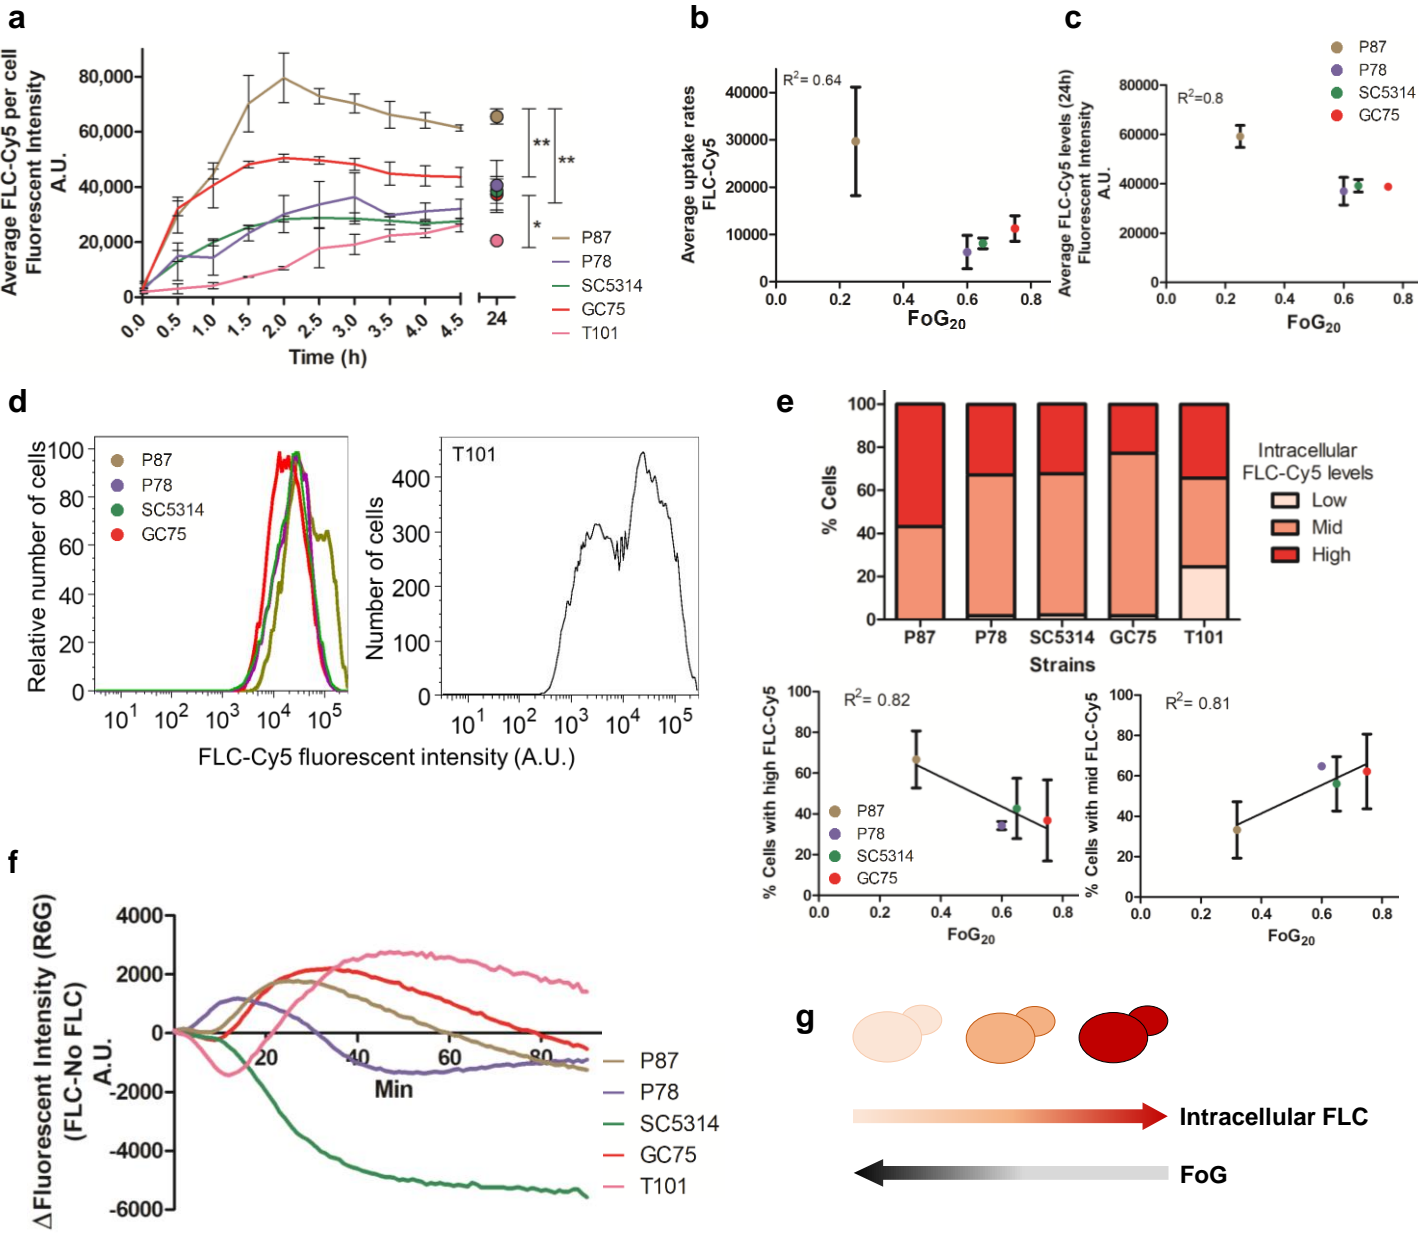

# Figure 4

**a**

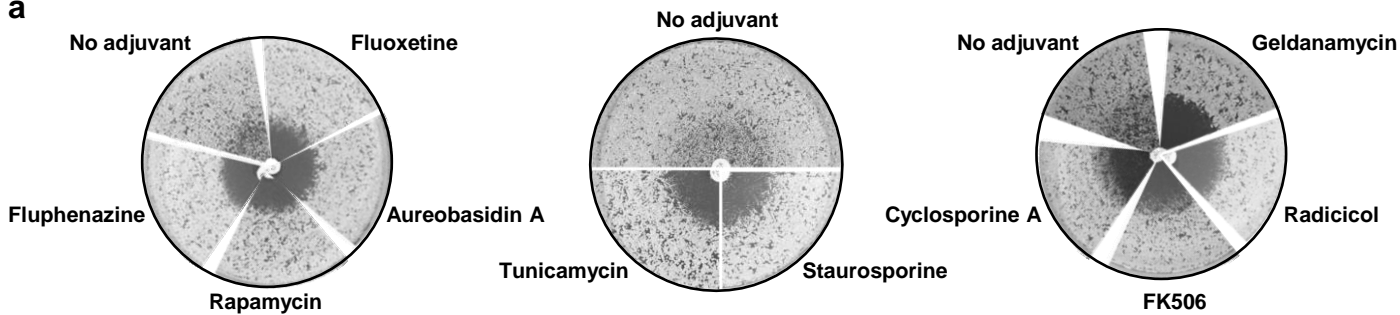

**b**

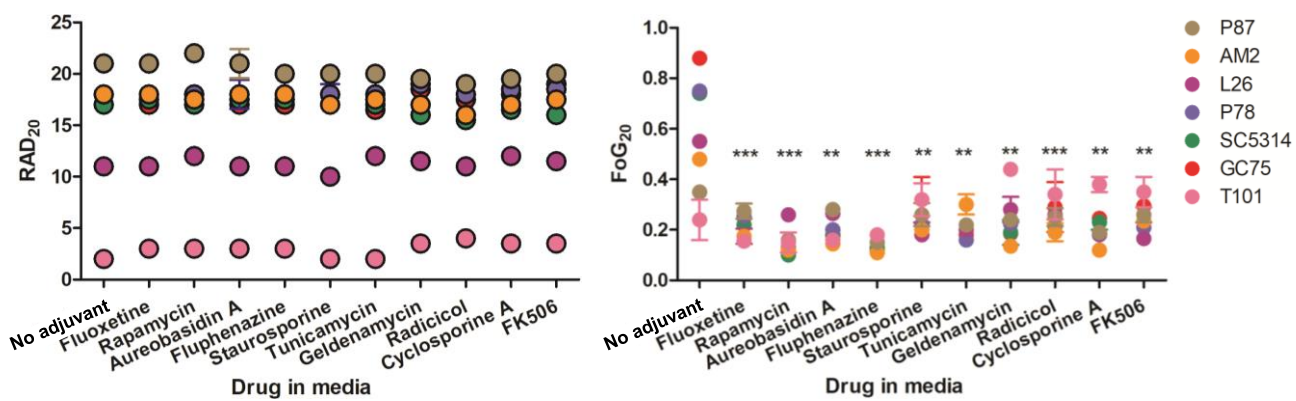

**c**

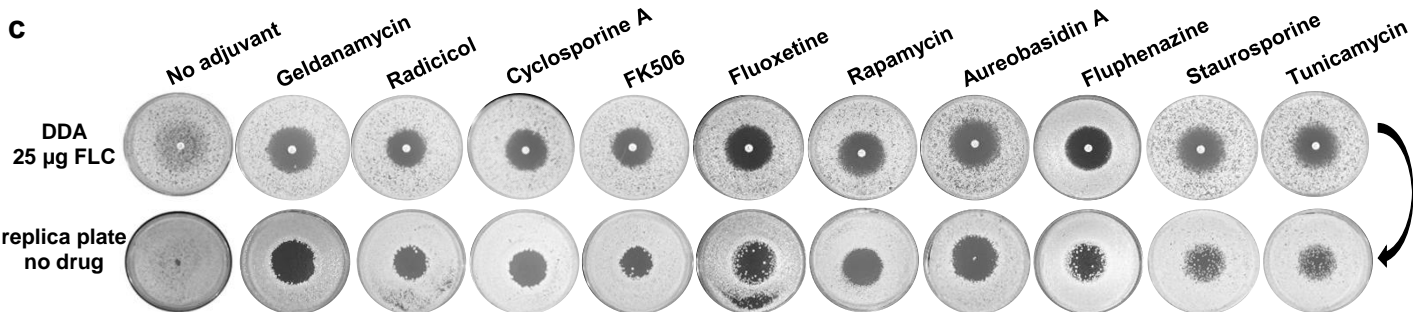

**d**

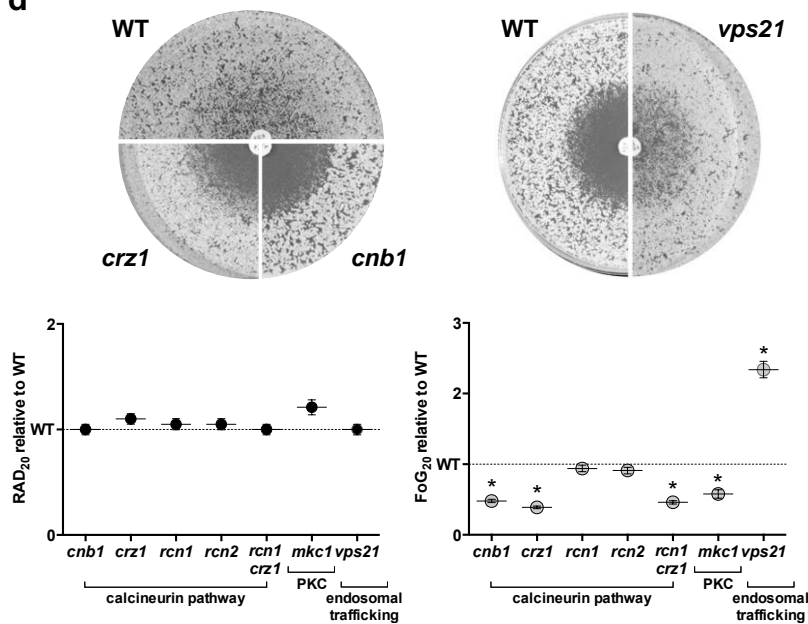

**e**

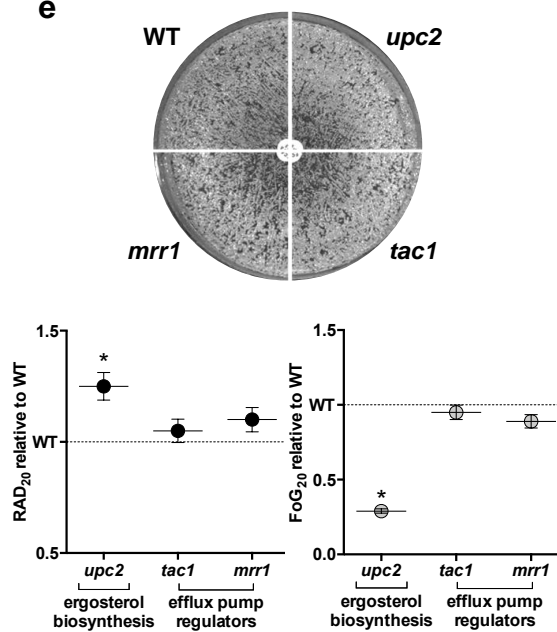

# Figure 5

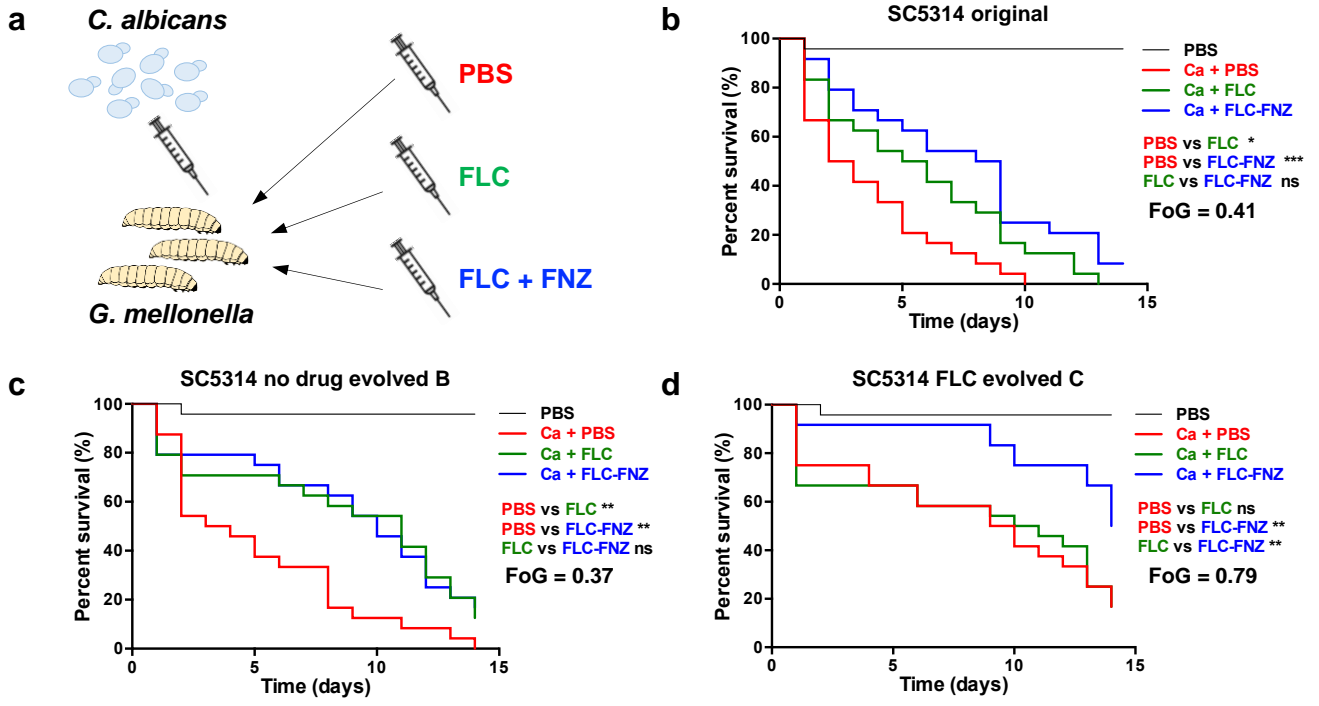

**Figure 6**

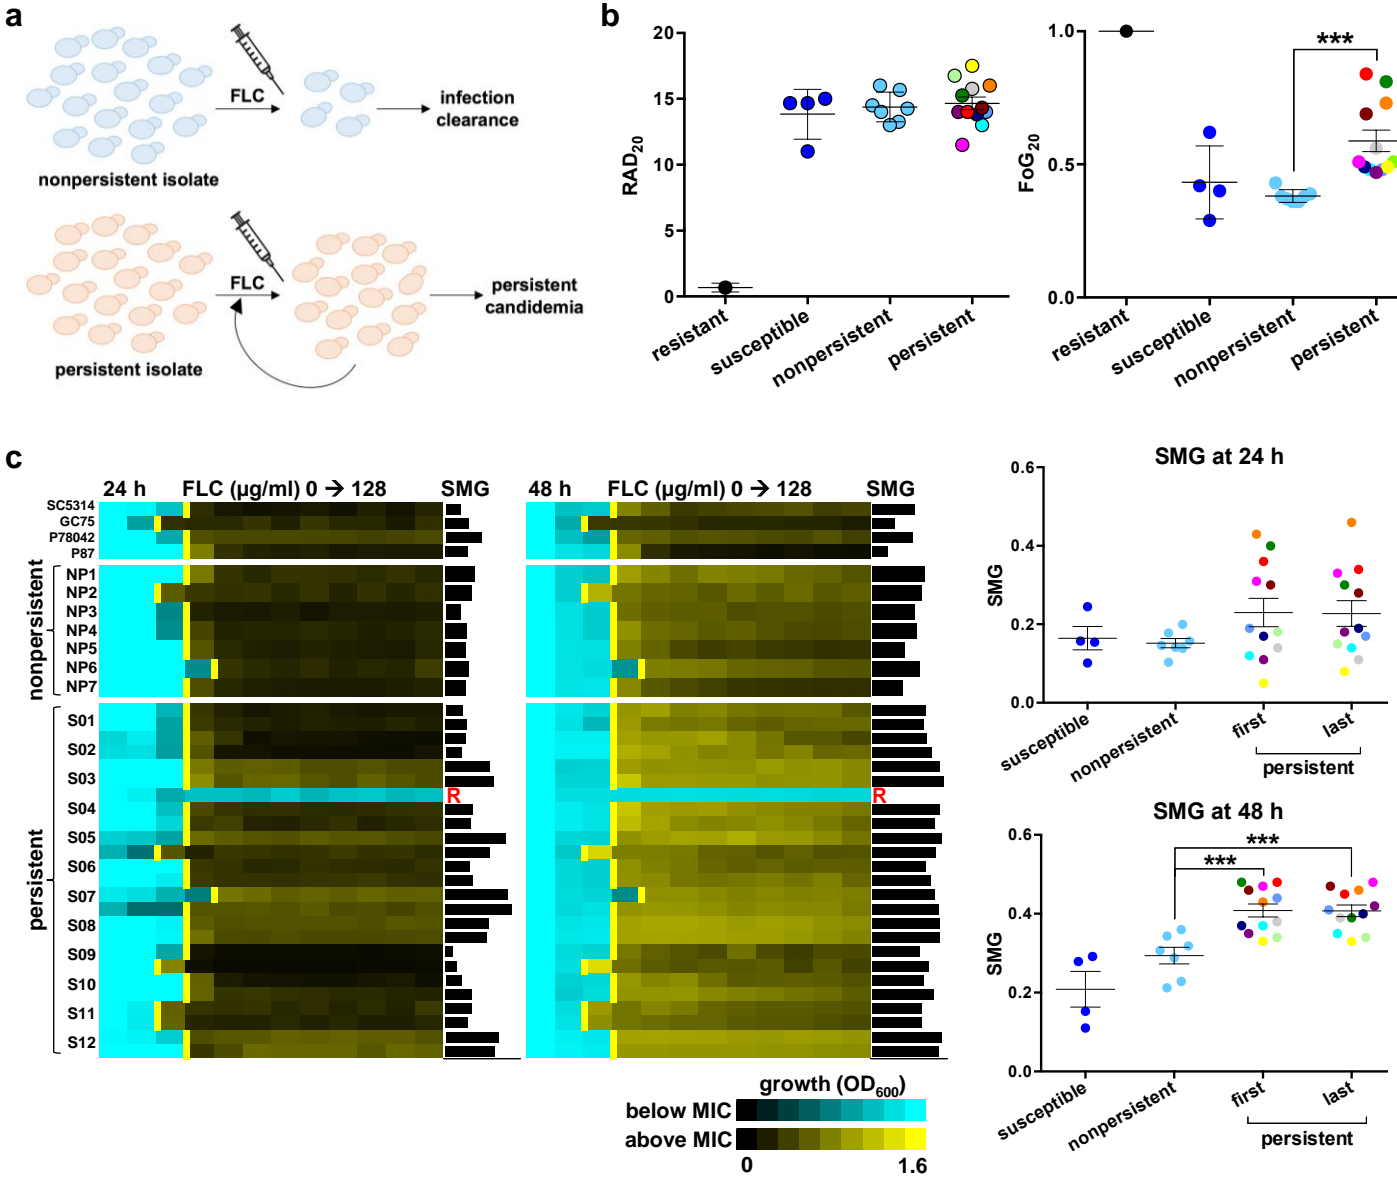

Source: http://biorxiv.org/content/10.1101/206359v2.full.pdf
